# Supplementary material for: Restoration of normal embryogenesis by mitochondrial supplementation in pig oocytes exhibiting mitochondrial DNA deficiency
Source: PubMed Central journal article supplement (PMC4796791; doi:10.1038/srep23229), 2016-03-18
Supplement: srep23229-s1.pdf [file srep23229-s1.pdf]

## Supplementary Information

### Restoration of normal embryogenesis by mitochondrial supplementation in pig oocytes exhibiting mitochondrial DNA deficiency

Gael LM Cagnone<sup>1,2</sup>, Te-Sha Tsai<sup>1,2</sup>, Yogeshwar Makanji<sup>1,2</sup>, Pamela Matthews<sup>1,2</sup>, Jodee Gould<sup>2,3</sup>, Michael S. Bonkowski<sup>4</sup>, Kirstin D. Elgass<sup>5</sup>, Ashley S. A. Wong<sup>6</sup>, Lindsay E. Wu<sup>6</sup>, Matthew McKenzie<sup>1,2</sup>, David A. Sinclair<sup>4</sup> and Justin C. St. John<sup>1,2</sup>

<sup>1</sup> Centre for Genetic Diseases, Hudson Institute of Medical Research, 27-31 Wright Street, Clayton, Vic 3168, AUSTRALIA.

<sup>2</sup> Department of Molecular and Translational Science, Monash University, 27-31 Wright Street, Clayton, Vic 3168, AUSTRALIA.

<sup>3</sup> Centre for Innate Immunity and Infectious Diseases, Hudson Institute of Medical Research, 27-31 Wright Street, Clayton, Vic 3168, AUSTRALIA.

<sup>4</sup> Department of Genetics, Harvard Medical School, 77 Avenue Louis Pasteur, Boston, MA, 02115, USA.

<sup>5</sup> Monash Micro Imaging, Monash University, 27-31 Wright Street, Vic 3168 Clayton, AUSTRALIA.

<sup>6</sup> School of Medical Sciences, University of New South Wales, NSW 2052, AUSTRALIA.

Correspondence should be addressed to JCS ([Justin.StJohn@hudson.org.au](mailto:Justin.StJohn@hudson.org.au))

**Supplementary Tables:**

**Supplementary Table 1 Maturation rates for BCB<sup>+</sup> and BCB<sup>-</sup> oocytes. \*\*\*\* represents a significant difference of p<0.0001.**

| <b>IVM selection</b> | <b>% MII /unlysed</b> | <b>% lysed oocytes</b> |
|----------------------|-----------------------|------------------------|
| BCB <sup>+</sup>     | 51.4                  | -                      |
| BCB <sup>-</sup>     | 20.3****              | 51.2****               |

**Supplementary Table 2** Differentially expressed genes (T-Test, FDR p0.05).

| Differentially expressed genes<br>(T-Test, FDR p0.05) | <b>BCB- ICSI vs BCB+ ICSI</b> |            |              |                                                                   |
|-------------------------------------------------------|-------------------------------|------------|--------------|-------------------------------------------------------------------|
|                                                       | FC (abs)                      | Regulation | p (Corr)     | Annotation                                                        |
| PARD3                                                 | 12.798875                     | up         | 0.007226747  | par-3 family cell polarity regulator                              |
| LOC100518872                                          | 12.26795                      | up         | 0.0063775624 | PREDICTED: Sus scrofa cyclin-Y-like protein 1-like                |
| ITIH3                                                 | 2.560489                      | down       | 0.007226747  | inter-alpha-trypsin inhibitor heavy chain 3                       |
| CACNG2                                                | 1.7065419                     | down       | 0.009950955  | calcium channel, voltage-dependent, gamma subunit 2               |
| LOC100511338                                          | 1.6169696                     | down       | 0.009950955  | putative olfactory receptor 51H1-like [ <i>Sus scrofa</i> (pig) ] |

  

| Differentially expressed genes<br>(T-Test, FDR p0.05) | <b>BCB- mICSI vs BCB- ICSI</b> |            |             |                         |
|-------------------------------------------------------|--------------------------------|------------|-------------|-------------------------|
|                                                       | FC (abs)                       | Regulation | p (Corr)    | Annotation              |
| RNF185                                                | 4.944855                       | down       | 0.042696994 | ring finger protein 185 |

  

| Differentially expressed genes<br>(T-Test, FDR p0.05) | <b>BCB- mICSI vs BCB+ ICSI</b> |            |             |                                                           |
|-------------------------------------------------------|--------------------------------|------------|-------------|-----------------------------------------------------------|
|                                                       | FC (abs)                       | Regulation | p (Corr)    | Annotation                                                |
| TRUB2                                                 | 11.971094                      | up         | 0.022296814 | TruB pseudouridine (psi) synthase family member 2         |
| U2                                                    | 9.439158                       | down       | 0.022296814 | U2 spliceosomal RNA                                       |
| Novel Gene                                            | 7.371409                       | up         | 0.03748932  | Uncharacterized                                           |
| LOC100155709                                          | 5.664736                       | up         | 0.022296814 | PREDICTED: Sus scrofa similar to Ras and Rab interactor 3 |
| LOC100621956                                          | 3.0817018                      | down       | 0.022296814 | Uncharacterized                                           |

|              |           |      |             |                                                               |
|--------------|-----------|------|-------------|---------------------------------------------------------------|
| LOC100514474 | 1.7616882 | down | 0.025045672 | RNA binding motif protein 25-like [ <i>Sus scrofa</i> (pig) ] |
| Novel Gene   | 1.3905554 | down | 0.025045672 | Uncharacterized                                               |

**Supplementary Table 3 Differentially expressed genes, ANOVA FDR 0.05. Fold-change is relative to BCB<sup>+</sup> ICSI.**

| GENE_SYMBOL  | ANOVA<br>FDR | BCB <sup>-</sup> ICSI               | BCB <sup>-</sup> mICSI | REFSEQ       | ANNOTATION                                                        |
|--------------|--------------|-------------------------------------|------------------------|--------------|-------------------------------------------------------------------|
|              |              | Fold-change / BCB <sup>+</sup> ICSI |                        |              |                                                                   |
| LOC100513964 | 0.001397547  | 109.53825                           | 1.1065983              | XM_003134882 | YKT6 v-SNARE homolog (S. cerevisiae) [ <i>Sus scrofa</i> (pig) ]  |
| LOC100155709 | 0.043959606  | 4.357983                            | 5.664736               | XM_001927068 | PREDICTED: Sus scrofa similar to Ras and Rab interactor 3         |
| LOC100511338 | 0.022049557  | -1.6169696                          | -1.2750927             | XM_003129557 | Putative olfactory receptor 51H1-like [ <i>Sus scrofa</i> (pig) ] |
| LOC100621956 | 0.029266333  | -4.254771                           | -3.0817018             | XM_003353158 | Uncharacterized                                                   |
| NULL         | 0.043959606  | -1.7189069                          | -1.3905554             | Unknown      | Unknown                                                           |
| NULL         | 0.029266333  | -2.3549466                          | 1.3950651              | Unknown      | Unknown                                                           |

**Supplementary Table 4** Top networks for differentially expressed genes between ICSI BCB<sup>-</sup> and ICSI BCB<sup>+</sup> blastocysts (378 DEGs, 276 annotated).

| Networks | Molecules in Network                                                                                                                                                                                                                                                                                                        | Score | Focus Molecules | Top Diseases and Functions                                                                                            |
|----------|-----------------------------------------------------------------------------------------------------------------------------------------------------------------------------------------------------------------------------------------------------------------------------------------------------------------------------|-------|-----------------|-----------------------------------------------------------------------------------------------------------------------|
| 1        | Adaptor protein 2, ADRB, Akt, Ap2 alpha, AP2A2, AP2S1, ATG9A, BOK, CGREF1, Ck2, Clathrin, CREM, Cyclin A, Cyclin E, ENDOD1, EP300, EPS15L1, estrogen receptor, KLF5, LTBP1, MXD3, N-cor, NCOR1, NDFIP1, NUMB, OXNAD1, Pias, PPAR $\alpha$ -RXR $\alpha$ , SAFB2, SENP3, SERCA, SNAP91, SRI, thyroid hormone receptor, TRAP1 | 39    | 21              | Cellular Assembly and Organization, Cellular Function and Maintenance, Cell Death and Survival                        |
| 2        | Alpha Actinin, Ap1, ARHGEF1, BAG3, FAM118A, IBTK, Ifn, IFN Beta, Ige, IgG, Igm, IL1, Immunoglobulin, Interferon alpha, KIRREL, MAPKAPK3, NFkB (complex), NOXO1, OAS1, PDLIM2, PGK1, PLC gamma, PRKCSH, Pro-inflammatory Cytokine, PTPN11, ROCK2, Sapk, SPINT1, STK16, TCR, TFG, TMEM92, Tnf receptor, TRAF2, WDR34          | 34    | 19              | Cell Morphology, Cellular Assembly and Organization, Cellular Function and Maintenance                                |
| 3        | AAMDC, APIP, APRT, ATAD1, BAAT, CCDC120, CYTH2, DSC2, ELAVL1, EVPL, FAM178A, FAM73A, FBXO31, GALNT1, HNF4A, LMAN2L, MAPK3, MRPL37, NAGPA, NUDT11, NUFIP1, PEX3, PEX13, RAPH1, RTFDC1, SPATA6, STARD7, TANGO2, TC2N, TMEM189, TRIM15, TRUB2, UBC, YIPF2, ZNF300                                                              | 32    | 18              | Amino Acid Metabolism, Post-Translational Modification, Small Molecule Biochemistry                                   |
| 4        | ABHD4, ARF5, ATL3, BLOC1S2, CDS1, COMMD3, COMMD4, COMMD6, EML3, HEYL, HIST1H2BL, INIP, KATNA1, KATNB1, KBTBD6, LEPRE1, LMTK2, LRRC41, LZTS2, MBOAT7, NABP1, OSBPL3, OSBPL9, OSBPL10, OSBPL11, RAB11FIP4, RAB11FIP5, RACGAP1, RALB, RGL3, RHOBTB1, SMPD4, SMTN, UBC, YIF1A                                                   | 27    | 16              | Cancer, Cell Death and Survival, Cell Morphology                                                                      |
| 5        | AEBP1, Alpha actin, CERS4, COL17A1, collagen, Collagen(s), DBNL, DDR2, DIO3, ECSIT, EDN1, ERK1/2, Hsp27, INSL6, ITIH3, JINK1/2, LARGE, Mek, NADPH oxidase, NFAT (complex), Pdgf (complex), PDGFA, Pkg, PRDX2, PRDX5, PTPase, Rar, Rock, Rsk, SEMA3F, Smad, Sos, Tgf beta, TSH, VAV3                                         | 27    | 16              | Cancer, Cellular Movement, Organismal Development                                                                     |
| 6        | AMDHD2, APOOL, BRD4, C16orf59, CEBPD, CHID1, CRKL, DAZAP2, DHRS13, EHMT1, FAM178A, FAM203A, FAR1, FEZ1, FEZ2, GALK1, GALK2, GRTP1, HIST3H3, KANK4, LIMD2, MGEA5, OPTN, PLBD2, PSMA1, PSMD9, SETD8, SLC44A2, SMYD3, TERT, TRIT1, UBC, WHSC1, ZFAND2B, ZNF709                                                                 | 25    | 15              | Cellular Growth and Proliferation, Cell Death and Survival, Infectious Disease                                        |
| 7        | AAMDC, ABCF1, APP, ARAP1, ARNT2, BCAT2, CCBL1, CDH2, CELF2, CTNNA1, DLGAP5, DRAP1, ESR2, EXOSC3, FCHO1, GORASP2, GSTA3, HIST1H2AD, HTRA2, KIF3B, KIF5C, NUMB, PDCD7, PDSS2, PHYHD1, POLE3, PTPRQ, Rab11, ST6GALNAC6, STAU1, SUSD4, TAF9B, TCP11,                                                                            | 24    | 15              | Cellular Assembly and Organization, Cellular Function and Maintenance, Cardiovascular System Development and Function |

|    |                                                                                                                                                                                                                                                                                                               |    |    |                                                                                                                             |
|----|---------------------------------------------------------------------------------------------------------------------------------------------------------------------------------------------------------------------------------------------------------------------------------------------------------------|----|----|-----------------------------------------------------------------------------------------------------------------------------|
|    | THY1, TNNT2                                                                                                                                                                                                                                                                                                   |    |    |                                                                                                                             |
| 8  | ACTG2, Actin, ANKRA2, ATP6V0D2, calpain, CaMKII, CD3, Cofilin, Collagen type I, COPB2, Creb, ERK, F Actin, Growth hormone, Gsk3, GTF3C1, Lh, LSM7, MAP2K1/2, Nfat (family), NSMF, PDGF BB, PI3K (complex), PITPNB, Pkc(s), Rac, Ras homolog, RNF10, SLC25A11, SMN1/SMN2, SRF, STAT5a/b, UBE2W, UCK1, WDR26    | 22 | 15 | Inflammatory Disease, Inflammatory Response, Organismal Injury and Abnormalities                                            |
| 9  | ANP32E, ATAD1, ATG4A, CACHD1, CALU, CARHSP1, CBX8, CTSF, CYP1A1, DPCD, DYNC2H1, FRMD4A, IKBIP, MLLT1, NUP43, PARD3, PCGF5, PDRG1, PDZD11, PEX3, PEX7, PEX10, PEX13, PEX14, PHAX, PNMAL1, PPP6R2, REEP5, SNORA70, TAF1C, TIPRL, TP53, TRIAP1, TUBB8, UBC                                                       | 22 | 14 | Developmental Disorder, Hereditary Disorder, Metabolic Disease                                                              |
| 10 | 26s Proteasome, ABCC2, caspase, CD93, CELF2, Cg, CSNK1A1, DSG3, EPHX2, Focal adhesion kinase, FSH, GNRH, Hdac, hemoglobin, Histone h3, Histone h4, Insulin, Jnk, JUN, Mapk, Mmp, P38 MAPK, PEMT, Pka, Ras, RNA polymerase II, SMAD4, Smad2/3, TBX3, THRAP3, TRAF1-TRAF2-TRAF3, Ubiquitin, UNC45A, Vegf, WDR36 | 18 | 12 | Cardiovascular System Development and Function, Cellular Development, Skeletal and Muscular System Development and Function |
| 11 | ABCB11, beta-estradiol, betaine, CALCRL, CNN2, CRK, cyclic AMP, CYSTM1, DOK7, EVX1, F2RL2, GLRA1, GLRA2, GLRA3, GLRA4, GLRB, GRM4, HACE1, HOXD4, KMT2B, KRT1, LPAR4, MIOX, myo-inositol, OPRK1, PRICKLE3, RAMP2, RAMP3, RARB, Relaxin, SLC35D3, SLC6A6, taurine, TRHR, VIPR1                                  | 11 | 8  | Cell-To-Cell Signaling and Interaction, Reproductive System Development and Function, Cell Signaling                        |
| 12 | C17orf97, JMJD6                                                                                                                                                                                                                                                                                               | 2  | 1  | Organismal Development, Developmental Disorder, Ophthalmic Disease                                                          |

**Supplementary Table 5** Predicted up-stream regulators for differentially expressed genes between ICSI BCB<sup>-</sup> and ICSI BCB<sup>+</sup> blastocysts.

| Upstream Regulator    | Molecule Type           | Predicted Activation State | Activation z-score | p-value of overlap | Target molecules in dataset                                                 |
|-----------------------|-------------------------|----------------------------|--------------------|--------------------|-----------------------------------------------------------------------------|
| CREB1                 | Transcription regulator | Activated                  | 2.617              | 1.57E-03           | ↑BAG3, ↑CCBL1, ↑CGREF1, ↓CREM, ↑EDN1, ↓FAM73A, ↑JUN, ↑KLF5, ↑OXNAD1, ↓PITPN |
| ERBB2                 | Kinase                  | Activated                  | 2.236              | 1.51E-02           | ↑BCAT2, ↑EDN1, ↑EPHX2, ↑JUN, ↑MXD3, ↑PGK1, ↑PRDX2, ↑SMTN, ↑SPINT1, ↑UCK1    |
| BMP2                  | Growth factor           | Activated                  | 2.000              | 5.24E-02           | ↑EPHX2, ↑JUN, ↓SMAD4, ↑SPINT1                                               |
| troglitazone          | Chemical drug           | Activated                  | 2.000              | 2.90E-01           | ↑JUN, ↑PEMT, ↑PTPN11, ↑UCK1                                                 |
| lysophosphatidic acid | Chemical - other        |                            | 1.958              | 2.04E-03           | ↑EDN1, ↑JUN, ↑KLF5, ↑SRF                                                    |
| trichostatin A        | Chemical drug           |                            | 1.938              | 3.63E-01           | ↑CGREF1, ↓CREM, ↓SMAD4, ↑SMN1/SMN2, ↑SRF                                    |
| IL4                   | Cytokine                |                            | 1.890              | 1.61E-01           | ↑APRT, ↑BCAT2, ↑CELF2, ↑JUN, ↑MAPKAPK3, ↑NABP1, ↑PEX14, ↓VIPR1              |
| FOS                   | Transcription regulator |                            | 1.698              | 3.59E-02           | ↓CALU, ↑CELF2, ↑CERS4, ↑EPHX2, ↑JUN, ↑LARGE, ↓LTBP1, ↑VAV3                  |
| Insulin               | Group                   |                            | 1.513              | 3.02E-02           | ↓AEBP1, ↑EDN1, ↑JUN, ↑PGK1, ↑PTPN11, ↑SLC25A11                              |



**Supplementary Table 6** Top networks for differentially expressed genes between mICSI BCB<sup>-</sup> and ICSI BCB<sup>-</sup> blastocysts (192 DEGs, 127 annotated).

| Networks | Molecules in Network                                                                                                                                                                                                                                                                                                                                                             | Score | Focus Molecules | Top Diseases and Functions                                                                             |
|----------|----------------------------------------------------------------------------------------------------------------------------------------------------------------------------------------------------------------------------------------------------------------------------------------------------------------------------------------------------------------------------------|-------|-----------------|--------------------------------------------------------------------------------------------------------|
| 1        | ADAMTS5, APP, ASCC1, BACE2, CCND1, COPS5, CTSE, CXCL16, DEFA1 (includes others), ENDOD1, ERBB2, EVPL, EXOC7, FBXO31, IL5, IRF6, KLHL42, LFNG, MANF, MID2, NABP1, OLFML2A, PCIF1, PLBD1, PLS1, PPP6R2, RNF138, RNF185, SGOL1, SHMT2, SMARCD2, SRPX, UBC, UPB1, YKT6                                                                                                               | 37    | 18              | Cellular Movement, Hematological System Development and Function, Immune Cell Trafficking              |
| 2        | AFF4, APLP2, BCR (complex), caspase, CCND2, CD3, CDK16, CGREF1, Cyclin A, DNAJA3, ERK1/2, Growth hormone, Hsp27, Ifn gamma, Igm, IL18, Immunoglobulin, KLF5, LEMD3, LNX2, MAP2K1/2, Mek, NECAP2, Raf, Rap1, RAPGEF1, SERPINB10, Sos, STAT5a/b, STXBP4, TCR, Tnf (family), TNFSF9, TOM1L1, TRAF2                                                                                  | 36    | 17              | Cellular Development, Cellular Growth and Proliferation, Hematological System Development and Function |
| 3        | ADAM19, ADAMTS4, ADAMTS5, BRCC3, C16orf59, CAMSAP1, CDC42BPA, DKC1, DMD, DOCK1, DOCK4, DTNB, ECEL1, ELMO2, ELMO3, FAM172A, GALK2, GALNT2, IRF6, MANF, MARK2, MATN3, MATN4, PIGU, PYGM, RCSD1, RHOG, SLC9A6, SNORA62, SPTBN1, SYNM, TSC22D2, TTC32, UBC, ZC3H7A                                                                                                                   | 25    | 13              | Cell Morphology, Cellular Assembly and Organization, Cellular Development                              |
|          | AIM2, CD83, CUL4A, CXCL16, EPS15, geranylgeranyl pyrophosphate, Histone h3, Histone h4, Hsp70, IBTK, Il12 receptor, Il18r, IL18R1, IL18RAP, IL36B, Interferon alpha, Jnk, MEFV, NFkB (complex), PI3K (complex), Pkc(s), PPARGC1B, PRDX3, Ras homolog, RHOF, RNA polymerase II, RNF11, RTKN, SMYD3, SPATS2L, THRAP3, TLR1, TRAF1-TRAF2-TRAF3, voltage-gated calcium channel, WSB1 | 20    | 11              | Cellular Assembly and Organization, Cellular Development, Cellular Growth and Proliferation            |
| 5        | BDP1, CCR4, CCR5, CFTR, chemokine, CLEC7A, CXCL16, CXCL17, CYSLTR2, DUSP14, FFAR2, glycosaminoglycan, Gpcr, GPR34, GPR132, GPR143, IL18R1, IL18RAP, IL1B, IL36B, IRAK, LHX8, LPAR2, MAPK8, MAS1, MIOX, NFKBIZ, NMBR, OSBPL1A, PKD1, PSEN1, TACR1, TET2, XCL1, ZDHHC17                                                                                                            | 13    | 8               | Cell-To-Cell Signaling and Interaction, Cell Signaling, Molecular Transport                            |
| 6        | Akt, AMPK, Ap1, ARHGEF12, CaMKII, Collagen type I, Collagen(s), EDN1, ERK, estrogen receptor, Filamin, Focal adhesion kinase, FSH, GRAMD1B, IgG, IL1, Insulin, Lh, LIMK2, Mapk, MAPK1, MEP1B, Mmp, P38 MAPK, Pdgf (complex), PDGF BB, Pro-inflammatory Cytokine, Ras, Rock, Shc, SRC (family), STXBP3, Tgf beta, VAPB, Vegf                                                      | 13    | 8               | Cellular Assembly and Organization, Cancer, Tumor Morphology                                           |
| 7        | DNMT3B, LACC1                                                                                                                                                                                                                                                                                                                                                                    | 2     | 1               | DNA Replication, Recombination, and Repair, Gene Expression, Cancer                                    |

**Supplementary Table 7** Predicted up-stream regulators for differentially expressed genes between mICSI BCB<sup>-</sup> and ICSI BCB<sup>-</sup> blastocysts.

| Upstream Regulator           | Molecule Type               | Predicted Activation State | Activation z-score | Notes | p-value of overlap | Target molecules in dataset                         |
|------------------------------|-----------------------------|----------------------------|--------------------|-------|--------------------|-----------------------------------------------------|
| NFkB (complex)               | Complex                     | Inhibited                  | -2.208             | bias  | 3.62E-02           | ↓CCND2, ↓CGREF1, ↓EDN1, ↓IL18, ↓TRAF2               |
| IL5                          | Cytokine                    | Inhibited                  | -2.000             | bias  | 9.57E-03           | ↓CCND2, ↓LIMK2, ↓NABP1, ↓UPB1                       |
| HRAS                         | Enzyme                      |                            | -1.982             |       | 9.89E-02           | ↓CCND2, ↓CGREF1, ↓KLF5, ↓MAPK1                      |
| IL2                          | Cytokine                    |                            | -1.406             | bias  | 2.03E-02           | ↓CCND2, ↓EDN1, ↓IL18, ↑TNFSF9, ↓TRAF2               |
| AGT                          | Growth factor               |                            | -1.114             | bias  | 1.12E-02           | ↓CCND2, ↓CGREF1, ↓EDN1, ↓IL18, ↓KLF5                |
| EGF                          | Growth factor               |                            | -1.098             | bias  | 3.72E-03           | ↓CCND2, ↓EDN1, ↓EPS15, ↓LIMK2, ↓MAPK1, ↓TRAF2       |
| IGF1                         | Growth factor               |                            | -1.091             | bias  | 3.64E-02           | ↓CCND2, ↓EDN1, ↓IL18, ↓MAPK1                        |
| Salmonella enterica serotype | Chemical toxicant           |                            | -1.000             | bias  | 2.11E-03           | ↓EDN1, ↓IL18, ↑TNFSF9, ↓UPB1                        |
| IL15                         | Cytokine                    |                            | -0.900             | bias  | 2.62E-02           | ↓CCND2, ↓EDN1, ↓MAPK1, ↑PPARGC1B                    |
| NKX2-3                       | Transcription regulator     |                            | -0.854             |       | 4.43E-03           | ↓EDN1, ↓FAM172A, ↓SHMT2, ↓SRPX                      |
| FOXO1                        | Transcription regulator     |                            | -0.447             | bias  | 3.29E-03           | ↓IL18, ↓LEMD3, ↑PPARGC1B, ↑TNFSF9, ↓TRAF2           |
| MAP3K8                       | Kinase                      |                            | 0.000              |       | 8.12E-05           | ↓IL18, ↑PPARGC1B, ↑RCSD1, ↓RHOF, ↓SPATS2L           |
| forskolin                    | Chemical toxicant           |                            | 0.000              |       | 3.71E-02           | ↓CCND2, ↓CDK16, ↓EDN1, ↓MAPK1, ↓TRAF2               |
| CD3                          | Complex                     |                            | 0.928              | bias  | 1.53E-02           | ↓CCND2, ↑CUL4A, ↓MAPK1, ↑SERPINB10, ↓TOM1L1, ↓TRAF2 |
| U0126                        | Chemical – kinase inhibitor |                            | 1.213              | bias  | 1.58E-02           | ↓CCND2, ↓EDN1, ↓GRAMD1B, ↓KLF5, ↓MAPK1              |
| resveratrol                  | Chemical drug               |                            | 1.954              |       | 1.19E-02           | ↓CCND2, ↓EDN1, ↓IL18, ↓TRAF2                        |
| MXD1                         | Transcription               |                            |                    |       | 4.40E-04           | ↓CCND2, ↓EDN1                                       |

|                            |                                 |  |  |  |          |                                          |
|----------------------------|---------------------------------|--|--|--|----------|------------------------------------------|
|                            | regulator                       |  |  |  |          |                                          |
| levamisole                 | Chemical drug                   |  |  |  | 4.40E-04 | ↓EDN1, ↓IL18                             |
| ROCK1                      | Kinase                          |  |  |  | 7.58E-04 | ↓CCND2, ↓EDN1                            |
| PD 169316                  | Chemical – kinase inhibitor     |  |  |  | 1.31E-03 | ↓CCND2, ↑PPARGC1B                        |
| DOCK8                      | Other                           |  |  |  | 1.38E-03 | ↓CCND2, ↓EDN1, ↓IL18                     |
| SASH1                      | Other                           |  |  |  | 1.50E-03 | ↓CCND2, ↓EDN1, ↓IL18                     |
| MET                        | Kinase                          |  |  |  | 1.83E-03 | ↓CCND2, ↓EDN1, ↓IL18                     |
| stearic acid               | Chemical – endogenous mammalian |  |  |  | 2.01E-03 | ↓EDN1, ↑PPARGC1B                         |
| EPO                        | Cytokine                        |  |  |  | 2.04E-03 | ↓CCND2, ↓EDN1, ↓IL18, ↓OSBPL1A, ↑SMARCD2 |
| COL18A1                    | Other                           |  |  |  | 2.87E-03 | ↓EDN1, ↓IL18, ↓MAPK1                     |
| SAMSN1                     | Other                           |  |  |  | 3.05E-03 | ↓CCND2, ↓EDN1, ↓IL18                     |
| 1D-chiro-inositol          | Chemical – endogenous mammalian |  |  |  | 3.17E-03 | ↓MIOX                                    |
| Sn-glycero-3-phosphocholin | Chemical – endogenous mammalian |  |  |  | 3.17E-03 | ↓MIOX                                    |
| KRT1                       | Other                           |  |  |  | 3.17E-03 | ↓IL18                                    |
| PHIP                       | Other                           |  |  |  | 3.17E-03 | ↓CCND2                                   |
| PSMC4                      | Peptidase                       |  |  |  | 3.17E-03 | ↓CCND2                                   |
| PSMA2                      | Peptidase                       |  |  |  | 3.17E-03 | ↓CCND2                                   |
| ZKSCAN3                    | Transcription regulator         |  |  |  | 3.17E-03 | ↓CCND2                                   |
| PSMD6                      | Enzyme                          |  |  |  | 3.17E-03 | ↓CCND2                                   |
| CXXC4                      | Other                           |  |  |  | 3.17E-03 | ↓TET2                                    |
| 2.5-dihydroxymethylcinnam  | Chemical – kinase inhibitor     |  |  |  | 3.17E-03 | ↓EDN1                                    |

**Supplementary Table 8** Top networks for differentially expressed genes between mICSI BCB<sup>-</sup> and ICSI BCB<sup>+</sup> blastocysts (311 DEGs, 222 annotated).

| Networks | Molecules in Network                                                                                                                                                                                                                                                                                            | Score | Focus Molecules | Top Diseases and Functions                                                                         |
|----------|-----------------------------------------------------------------------------------------------------------------------------------------------------------------------------------------------------------------------------------------------------------------------------------------------------------------|-------|-----------------|----------------------------------------------------------------------------------------------------|
| 1        | Akt, BRD8, CARM1, Cbp/p300, CCNK, CLK1, estrogen receptor, ETV6, FLAD1, GTF2H1, Hdac, HDAC11, HISTONE, Histone h3, Histone h4, Holo RNA polymerase II, IRF3, KAT2B, MEF2, METTL8, N-cor, NCOR1, OSTF1, OXNAD1, PBX3, PHF19, RNA polymerase II, SAFB2, SMARCD2, SMN1/SMN2, SMYD3, SUPT16H, SWI-SNF, TESK1, USP18 | 43    | 23              | Cell Cycle, DNA Replication, Recombination, and Repair, Cancer                                     |
| 2        | 26s Proteasome, AFF4, ARHGEF1, ATF4, BCKDHA, Ck2, CSNK1A1, F Actin, FSH, FTH1, FTMT, GMFB, GNGT1, GNRH, Hsp70, Hsp90, IFN Beta, Immunoglobulin, Interferon alpha, LRRFIP1, NFkB (complex), NR3C1, P38 MAPK, PHF3, PI3K (complex), Pka, PKN3, PPP1R9A, STUB1, TP53I3, TRA2A, TUFM, UNC45A, ZC3HAV1, ZFP91        | 41    | 21              | Cellular Compromise, Infectious Disease, Drug Metabolism                                           |
| 3        | ABHD5, ADCK3, ANAPC15, APRT, AS3MT, ASNA1, C8orf4, CHIC2, EEF1D, ELAVL1, EPB41L4B, FAM73A, FASTKD2, GOLGA1, GOPC, HNF4A, IFT122, LIN54, LRRC8A, MRPL37, MUTYH, PDCL3, POGK, PXDC1, RAB6A, S100A14, SLC19A2, SLC27A4, SLC38A1, SLC43A1, TANGO2, TRUB2, UBC, UBLCP1, WDFY3                                        | 31    | 17              | Dermatological Diseases and Conditions, Developmental Disorder, Hereditary Disorder                |
| 4        | AP2A2, APP, ARAP1, ARF4, C11orf63, CDKN1A, CPNE6, DCLK3, DNAH1, DNAH5, DNAH6, DNAH8, DNAH10, DNAH12, DNAH14, DNAH17, DNAI1, DNAI2, DNAL1, DNALI1, DYNLT1, GPKOW, LDHB, MPG, NECAP1, PCIF1, PDS5B, PHYHD1, PP2A, PPM1J, PPP1R2, SCYL1, TFPT, TIPRL, UBE2S                                                        | 29    | 17              | Developmental Disorder, Hereditary Disorder, Respiratory Disease                                   |
| 5        | ARMC8, ARV1, ATF7IP, COMMD3, COMMD4, COMMD6, CPPED1, DERL1, DOCK1, ELMO1, ELMO2, ELMO3, FBXO44, GID8, KIAA0368, LEPREL4, LIN28B, MAEA, MAGEA11, MCAT, MKLN1, MTERF4, NPLOC4, NSUN4, PCDHB4, PTSS1, RANBP9, RMND5A, SLC30A5, SLC30A6, SUSD1, TRUB2, UBC, ZFAND2B, ZNF777                                         | 28    | 16              | Cancer, Cellular Movement, Neurological Disease                                                    |
| 6        | APPBP2, ARHGEF3, AUH, AURKAIP1, BDP1, CELF2, CEP131, DCAF6, DCAF8, DMPK, DUSP22, ENC1, ETV6, FGFR1OP2, GEMIN5, INPP5K, LGALS8, MAPK8, MBOAT7, MIOX, MZB1, NFE2L2, OAZ1, OSGIN1, PANK2, PHAX, POMT1, RAB11FIP4, RAB11FIP5, RAC3, SCG2, SCOC, SPRED2, UBC, VPS36                                                  | 24    | 14              | Endocrine System Development and Function, PostOTranslational Modification, Developmental Disorder |
| 7        | 14-3-3, Ap1, ATP1A3, Collagen(s), Creb, CYTH2, DBNL, DCN, DDIT4, Dynamin, ELK1, ERK1/2, GNAI2, HSH2D, IARS, Igm, IL1, ITSN1, LDL, MAP2K1/2, MCL1, Mek, Nfat (family), p70 S6k, p85 (pik3r), Pdgf (complex), PDGF BB, PELI1, Pias, Ras, RBM7, TCR, TEAD4, Tgf beta, XPNPEP2                                      | 23    | 15              | Cellular Assembly and Organization, Nervous System Development and Function, Antigen Presentation  |
| 8        | ADA, ARHGEF2, CLDN7, CSF2, CYP11B1, CYP1A1, dolichyl-phosphate                                                                                                                                                                                                                                                  | 15    | 10              | Lipid Metabolism, Small Molecule                                                                   |

|    |                                                                                                                                                                                                                                                                                                                                     |    |   |                                                             |
|----|-------------------------------------------------------------------------------------------------------------------------------------------------------------------------------------------------------------------------------------------------------------------------------------------------------------------------------------|----|---|-------------------------------------------------------------|
|    | beta-D-mannosyltransferase, DPM2, DPM3, EGF, Eif4g, GAS1, GIGYF2, GSTA1, Importin alpha, LTB, Nuclear factor 1, PDE4B, PDE6A, PP1 protein complex group, Ppp1cc, PPP1R12C, PQLC3, PURA, RMDN3, SLC37A1, SNORA70, SNTB1, SOX4, SRC (family), TJP2, TNFRSF9, TP53, TRA2B, YWHAZ                                                       |    |   | Biochemistry, Vitamin and Mineral Metabolism                |
| 9  | Actin, ADIPOR2, CD3, CLCF1, CPEB2, DDAH2, DUSP16, DUSP22, Eif4g, ERK, FABP3, Fgfr, IL1RAP, IL36G, IL3RA, Insulin, Jnk, JUN/JUNB/JUND, MAP4K3, Mapk, mir-210, miR-146a-5p (and other miRNAs w/seed GAGAACU), NAGA, PITPNB, Pkc(s), PLEKHA4, PP1 protein complex group, PRC1, PSMC3IP, PTP4A2, SPRED2, TLR1, TMSB10/TMSB4X, VAV, Vegf | 10 | 7 | Carbohydrate Metabolism, Cell Cycle, Developmental Disorder |
| 10 | ADAL, adenosine deaminase                                                                                                                                                                                                                                                                                                           | 2  | 1 | Infectious Disease, Reproductive System Disease, Cancer     |

**Supplementary Table 9** Predicted up-stream regulators for differentially expressed genes between mICSI BCB<sup>-</sup> and ICSI BCB<sup>+</sup> blastocysts.

| Upstream Regulator                          | Molecule Type           | Predicted Activation State | Activation z-score | Notes | p-value of overlap | Target molecules in dataset                                                      |
|---------------------------------------------|-------------------------|----------------------------|--------------------|-------|--------------------|----------------------------------------------------------------------------------|
| methylprednisolone                          | Chemical drug           | Activated                  | 2.219              |       | 9.84E-02           | ↑AP2A2, ↑CLDN7, ↑DDIT4, ↓GNAI2, ↓NR3C1, ↑SMN1/SMN2                               |
| MYC                                         | Transcription regulator | Activated                  | 2.156              |       | 3.13E-02           | ↑ATF4, ↑CLDN7, ↑CYTH2, ↑DDIT4, ↑FTH1, ↑LDHB, ↓MCL1, ↑SMN1//SMN2, ↑TP5313, ↑UBE2S |
| STAT4                                       | Transcription regulator | Activated                  | 2.000              | bias  | 4.01E-02           | ↑AP2A2, ↑ATF4, ↑DPM3, ↑LRRFIP1                                                   |
| streptozocin                                | Chemical drug           |                            | 1.980              |       | 3.46E-02           | ↑ADIPOR2, ↑FABP3, ↑MIOX, ↑STUB1                                                  |
| TP73                                        | Transcription regulator |                            | 1.940              |       | 9.37E-02           | ↑AUH, ↑DDIT4, ↑MUTYH, ↑TP5313                                                    |
| troglitazone                                | Chemical drug           |                            | 1.432              |       | 1.90E-03           | ↓ARF4, ↑BCKDHA, ↓DCN, ↑ELK1, ↑FABP3, ↓MCL1, ↑PCIF1, ↑USP18                       |
| etoposide                                   | Chemical drug           |                            | 1.412              |       | 1.24E-02           | ↑DDIT4, ↑FTH1, ↓MCL1, ↑TP5313                                                    |
| FGF2                                        | Growth factor           |                            | 1.408              |       | 1.59E-02           | ↑ATF4, ↓DCN, ↑ELK1, ↑FTH1, ↓NR3C1, ↑TEAD4                                        |
| miR-16-5p (and other miRNAs w/seed AGCAGCA) | Mature microRNA         |                            | 1.214              | bias  | 2.77E-02           | ↓GTF2H1, ↓MCL1, ↓PURA, ↑UBE2S                                                    |
| CREB1                                       | Transcription regulator |                            | 1.000              |       | 3.74E-02           | ↓ETV4, ↓FAM73A, ↓MCL1, ↑OSTF1, ↑OXNAD1, ↓PITPNB, ↑SMN1/SMN2                      |
| dexamethasone                               | Chemical drug           |                            | 0.768              |       | 4.07E-04           | ↑ATF4, ↑AUH, ↑BCKDHA, ↑CELF2, ↓CSNK1A1, ↓DCN, ↑DDIT4, ↑ELK1, ↑FTH1, ↓GNAI2       |
| N-acetyl-L-cysteine                         | Chemical drug           |                            | 0.277              |       | 2.77E-02           | ↑ATF4, ↑ATP1A3, ↓GNAI2, ↑MIOX                                                    |
| BRCA1                                       | Transcription regulator |                            | 0.152              |       | 1.05E-02           | ↑DDIT4, ↓GTF2H1, ↓NR3C1, ↑TP5313                                                 |
| thapsigargin                                | Chemical toxicant       |                            | 0.137              |       | 1.50E-02           | ↑ADIPOR2, ↑ATF4, ↑DDIT4,                                                         |

|                                        |                                     |  |        |      |          |                                                                                   |
|----------------------------------------|-------------------------------------|--|--------|------|----------|-----------------------------------------------------------------------------------|
|                                        |                                     |  |        |      |          | ↓MCL1                                                                             |
| tunicamycin                            | Chemical – endogenous non-mammalian |  | -0.045 |      | 9.32E-03 | ↑ADIPOR2, ↑ATF4, ↑DDIT4, ↓MCL1                                                    |
| D-glucose                              | Chemical – endogenous mammalian     |  | -0.065 |      | 2.94E-02 | ↓ARF4, ↑ATF4, ↓DCN, ↑DDIT4, ↑MIOX, ↓NR3C1, ↑STUB1                                 |
| valproic acid                          | Chemical drug                       |  | -0.176 |      | 6.90E-03 | ↓ABHD5, ↑CARM1, ↑DPM2, ↓ETV6, ↓GNAI2, ↓NR3C1, ↑SMN1/SMN2                          |
| phorbol myristate acetate              | chemical drug                       |  | -0.258 |      | 1.72E-03 | ↑APRT, ↓ARF4, ↑ATP1A3, ↑DDIT4, ↑EEF1D, ↑ELK1, ↑FTH1, ↓GNAI2, ↓HSH2D, ↓KAT2B       |
| IRF7                                   | Transcription regulator             |  | -0.277 | bias | 2.92E-03 | ↑ATF4, ↓MCL1, ↓PELI1, ↑USP18, ↓ZC3HAV1                                            |
| Benzyloxycarbonyl-Leu-Leu-Leu aldehyde | Chemical – protease inhibitor       |  | -0.278 |      | 2.21E-02 | ↑ATF4, ↓DCN, ↓MCL1, ↑NCOR1, ↓NR3C1                                                |
| sirolimus                              | Chemical drug                       |  | -0.647 |      | 3.62E-03 | ↑ATF4, ↑BCKDHA, ↑DDIT4, ↑FTH1, ↑LDHB, ↓MCL1, ↓NR3C1, ↑TUFM                        |
| 5-fluorouracil                         | Chemical drug                       |  | -1.067 |      | 4.36E-02 | ↑ATF4, ↑IARS, ↓MCL1, ↑PRC1                                                        |
| camptothecin                           | Chemical reagent                    |  | -1.387 |      | 9.05E-04 | ↑ARHGEF1, ↑CYTH2, ↓GNAI2, ↑ITSN1, ↑MBOAT7, ↓MCL1, ↓NR3C1, ↑OSTF1, ↑TP53I3, ↓TRA2A |

**Supplementary Table 10** Top networks for genes that are similar between ICSI BCB<sup>+</sup> and mICSI BCB<sup>-</sup> but different to ICSI BCB<sup>-</sup> blastocysts (168 genes identified, 90 annotated)

| Networks | Molecules in Network                                                                                                                                                                                                                                                                                | Score | Focus Molecules | Top Diseases and Functions                                                                             |
|----------|-----------------------------------------------------------------------------------------------------------------------------------------------------------------------------------------------------------------------------------------------------------------------------------------------------|-------|-----------------|--------------------------------------------------------------------------------------------------------|
| 1        | BACE2, C11orf49, C9orf40, DGKE, DLEC1, ENDOD1, EPS15L1, EVPL, FAS, FN1, GABRA5, GGA1, GIPC3, HPS4, hydrogen peroxide, KLHL42, LRP3, MBOAT7, METTL2A, MIOX, NABP1, NNT, NUP43, PLAG1, PPP6R2, PTP4A3, RAC1, SHMT2, SLC7A8, STAB1, STAT3, UBC, UBR2, ZNF419, ZNF860                                   | 48    | 22              | Cell Morphology, Connective Tissue Development and Function, Cell Death and Survival                   |
| 2        | 26s Proteasome, ACADS, Actin, Akt, Ap1, ASCC1, caspase, CCDC120, CD3, CHAF1A, ERK, Histone h3, Histone h4, Hsp90, IBTK, IKK (complex), Insulin, LRWD1, MID2, MYBPC1, NCK1, NFkB (complex), NR1I2, PARK2, PCCB, PITPNM1, PLS1, Proinsulin, Rac, SMARCE1, THRAP3, TRAF2, UBE2E2, UBN1, Vegf           | 40    | 19              | Gene Expression, Protein Synthesis, Connective Tissue Disorders                                        |
| 3        | APLP2, ATP13A2, CDK16, CGREF1, Creb, Cyclin E, EDN1, ERBB2, ERK1/2, estrogen receptor, FKBP5, FSH, Growth hormone, GTPase, KLF5, Ldh (complex), Lh, Mapk, Mek, N-cor, NOD1, PER1, Pkc(s), POU1F1, PRCC, RABAC1, Ras, RASAL2, RGS12, ROCK2, Rsk, Sos, TNIP1, Ubiquitin, WDYHV1                       | 37    | 18              | Cell-To-Cell Signaling and Interaction, Cellular Assembly and Organization, Cell Cycle                 |
| 4        | ADARB1, ALB, C16orf59, C4orf51, CA9, CLOCK, CSNK2A2, DGAT2, DYNLL1, FAM172A, FAM178A, FEZ1, FEZ2, FOXR1, GRK5, GSTK1, GSTP1, HEATR3, MGAT2, OPTN, PIGU, PLBD2, PPCDC, PSMA1, SCAF1, SDAD1, SLC25A32, TGIF1, TMEM63B, TOR4A, TVP23B, TXN2, UBC, UBQLN4, WHSC1                                        | 30    | 15              | Lipid Metabolism, Small Molecule Biochemistry, Cellular Development                                    |
| 5        | ARHGEF12, CD4, EFNB3, FBXO31, FFAR2, Gzmb, HNF4 $\alpha$ dimer, IL1B, JAM2, Jnk, MAP3K6, MAP4K2, Mapk kinase, MAS1, MTSS1, OCLN, P38 MAPK, PARD3, Pka, PLN, progesterone, RHOC, RHOQ, SLN, SMPDL3A, TAB3, TET2, TMEM79, TNFRSF17, Tnfrsf22/Tnfrsf23, TNFSF9, TNFSF15, TNMD, TRAF1-TRAF2-TRAF3, UBL7 | 11    | 7               | Cellular Development, Cellular Growth and Proliferation, Hematological System Development and Function |



**Supplementary Table 11** Predicted upstream regulators of genes that are commonly expressed between ICSI BCB<sup>+</sup> and mICSI BCB<sup>-</sup> but different to ICSI BCB<sup>-</sup> blastocysts.

| Upstream Regulator                            | Molecule Type                   | Predicted Activation State | Activation z-score | Notes | p-value of overlap | Target molecules in dataset                                              |
|-----------------------------------------------|---------------------------------|----------------------------|--------------------|-------|--------------------|--------------------------------------------------------------------------|
| HR                                            | transcription regulator         |                            |                    |       | 4.97E-04           | ↓DLEC1, ↑IBTK, ↑UBR2                                                     |
| forskolin                                     | chemical toxicant               |                            | -0.568             | bias  | 6.54E-04           | ↓CDK16, ↓CGREF1, ↓EDN1, ↑FKBP5, ↓PER1, ↓POU1F1, ↓RASAL2, ↓SLC7A8, ↓TRAF2 |
| fish oils                                     | chemical drug                   |                            |                    |       | 7.37E-04           | ↓EDN1, ↓KLF5, ↓NR1I2                                                     |
| TFAP2B                                        | transcription regulator         |                            |                    |       | 1.18E-03           | ↓EDN1, ↓ERBB2                                                            |
| Lh                                            | complex                         |                            |                    |       | 2.19E-03           | ↓CDK16, ↑FKBP5, ↓PER1, ↓RASAL2, ↓RGS12                                   |
| methylselenic acid                            | chemical reagent                |                            |                    |       | 2.31E-03           | ↓CDK16, ↓CHAF1A, ↑FKBP5, ↓RABAC1, ↓SMARCE1                               |
| lysophosphatidic acid                         | chemical - other                |                            |                    |       | 2.68E-03           | ↓EDN1, ↑FKBP5, ↓KLF5                                                     |
| 1D-chiro-inositol                             | chemical - endogenous mammalian |                            |                    |       | 3.68E-03           | ↓MIOX                                                                    |
| sn-glycero-3-phosphocholine                   | chemical - endogenous mammalian |                            |                    |       | 3.68E-03           | ↓MIOX                                                                    |
| tandospirone                                  | chemical drug                   |                            |                    |       | 3.68E-03           | ↓PER1                                                                    |
| CLEC16A                                       | other                           |                            |                    |       | 3.68E-03           | ↑PARK2                                                                   |
| miR-548d-3p (and other miRNAs w/seed AAAAACC) | mature microrna                 |                            |                    |       | 3.68E-03           | ↓ERBB2                                                                   |
| TIMELESS                                      | other                           |                            |                    |       | 3.68E-03           | ↓PER1                                                                    |
| LINC00570                                     | other                           |                            |                    |       | 3.68E-03           | ↓ROCK2                                                                   |
| SMARCC2                                       | transcription regulator         |                            |                    |       | 3.68E-03           | ↓SMARCE1                                                                 |
| DECR1                                         | enzyme                          |                            |                    |       | 3.68E-03           | ↓ERBB2                                                                   |
| CXXC4                                         | other                           |                            |                    |       | 3.68E-03           | ↓TET2                                                                    |
| SR11256                                       | chemical reagent                |                            |                    |       | 3.68E-03           | ↓EDN1                                                                    |

|                                               |                                     |  |       |  |          |                                         |
|-----------------------------------------------|-------------------------------------|--|-------|--|----------|-----------------------------------------|
| 2,5-dihydroxymethylcinnamate                  | chemical - kinase inhibitor         |  |       |  | 3.68E-03 | ↓EDN1                                   |
| triazolam                                     | chemical drug                       |  |       |  | 3.68E-03 | ↓PER1                                   |
| tartaric acid                                 | chemical reagent                    |  |       |  | 3.68E-03 | ↓ERBB2                                  |
| clorobiocin                                   | chemical drug                       |  |       |  | 7.34E-03 | ↓ERBB2                                  |
| myo-inositol                                  | chemical - endogenous mammalian     |  |       |  | 7.34E-03 | ↓MIOX                                   |
| retaspimycin                                  | chemical drug                       |  |       |  | 7.34E-03 | ↓ERBB2                                  |
| silipide                                      | chemical drug                       |  |       |  | 7.34E-03 | ↓ERBB2                                  |
| RBM17                                         | other                               |  |       |  | 7.34E-03 | ↓ERBB2                                  |
| LRIG3                                         | other                               |  |       |  | 7.34E-03 | ↓ERBB2                                  |
| Trk Receptor                                  | group                               |  |       |  | 7.34E-03 | ↓EDN1                                   |
| ACPP                                          | phosphatase                         |  |       |  | 7.34E-03 | ↓ERBB2                                  |
| miR-548h-5p (and other miRNAs w/seed AAAGUAA) | mature microrna                     |  |       |  | 7.34E-03 | ↓ERBB2                                  |
| ECE1                                          | peptidase                           |  |       |  | 7.34E-03 | ↓EDN1                                   |
| SLC8A1                                        | transporter                         |  |       |  | 7.34E-03 | ↓EDN1                                   |
| WWP1                                          | enzyme                              |  |       |  | 7.34E-03 | ↓KLF5                                   |
| EEF2K                                         | kinase                              |  |       |  | 7.34E-03 | ↓KLF5                                   |
| PLCD4                                         | enzyme                              |  |       |  | 7.34E-03 | ↓ERBB2                                  |
| Bhlhe41                                       | transcription regulator             |  |       |  | 7.34E-03 | ↓PER1                                   |
| BIIB028                                       | chemical drug                       |  |       |  | 7.34E-03 | ↓ERBB2                                  |
| lavendustin A                                 | chemical - kinase inhibitor         |  |       |  | 7.34E-03 | ↓EDN1                                   |
| phosphoramidon                                | chemical - endogenous non-mammalian |  |       |  | 7.34E-03 | ↓EDN1                                   |
| coumermycin                                   | chemical drug                       |  |       |  | 7.34E-03 | ↓ERBB2                                  |
| GnRH analog                                   | biologic drug                       |  | 0.447 |  | 7.92E-03 | ↓CDK16, ↓NR1H2, ↓PRCC, ↓SMARCE1, ↓TRAF2 |
| aldosterone                                   | chemical - endogenous mammalian     |  |       |  | 8.61E-03 | ↓EDN1, ↑FKBP5, ↓POU1F1                  |
| histone deacetylase                           | complex                             |  |       |  | 9.07E-03 | ↓PER1, ↓SLC7A8                          |

|                                    |                                   |  |        |      |          |                                                                                                |
|------------------------------------|-----------------------------------|--|--------|------|----------|------------------------------------------------------------------------------------------------|
| emodin                             | chemical drug                     |  |        |      | 9.99E-03 | ↓ERBB2, ↓TRAF2                                                                                 |
| LIPE                               | enzyme                            |  |        |      | 1.06E-02 | ↓EDN1, ↑FKBP5, ↓PER1                                                                           |
| ATF4                               | transcription regulator           |  |        |      | 1.06E-02 | ↓EDN1, ↑PARK2, ↓SHMT2                                                                          |
| Dexamethasone-GR                   | complex                           |  |        |      | 1.10E-02 | ↓NR1I2                                                                                         |
| muraglitazar                       | chemical drug                     |  |        |      | 1.10E-02 | ↓EDN1                                                                                          |
| DDX54                              | transcription regulator           |  |        |      | 1.10E-02 | ↓ERBB2                                                                                         |
| CSNK1E                             | kinase                            |  |        |      | 1.10E-02 | ↓PER1                                                                                          |
| miR-331-3p (miRNAs w/seed CCCCUGG) | mature microrna                   |  |        |      | 1.10E-02 | ↓ERBB2                                                                                         |
| URI1                               | transcription regulator           |  |        |      | 1.10E-02 | ↑FKBP5                                                                                         |
| AKAP13                             | other                             |  |        |      | 1.10E-02 | ↑FKBP5                                                                                         |
| VEZF1                              | transcription regulator           |  |        |      | 1.10E-02 | ↓EDN1                                                                                          |
| Mn2+                               | chemical - endogenous mammalian   |  |        |      | 1.10E-02 | ↓ATP13A2                                                                                       |
| TNF                                | cytokine                          |  | -0.234 | bias | 1.14E-02 | ↓ACADS, ↓EDN1, ↓ERBB2, ↓GABRA5, ↓KLF5, ↓NCK1, ↓NR1I2, ↓SLC7A8, ↓SMPDL3A, ↓TNIP1, ↓TRAF2, ↑UBR2 |
| PGR                                | ligand-dependent nuclear receptor |  |        |      | 1.21E-02 | ↓ERBB2, ↑FKBP5, ↓KLF5, ↓MBOAT7                                                                 |
| epicatechin                        | chemical drug                     |  |        |      | 1.25E-02 | ↑NUP43, ↓PITPNM1                                                                               |
| luminespib                         | chemical drug                     |  |        |      | 1.46E-02 | ↓ERBB2                                                                                         |
| WBSCR22                            | enzyme                            |  |        |      | 1.46E-02 | ↑FKBP5                                                                                         |
| (±)-2-hydroxyoleic acid            | chemical drug                     |  |        |      | 1.46E-02 | ↓ROCK2                                                                                         |
| AES                                | transcription regulator           |  |        |      | 1.46E-02 | ↓POU1F1                                                                                        |
| RGD1560225                         | other                             |  |        |      | 1.46E-02 | ↓EDN1                                                                                          |
| LPAR3                              | g-protein coupled receptor        |  |        |      | 1.46E-02 | ↓KLF5                                                                                          |
| N-hydroxy-2,2-diphenylacetamide    | chemical reagent                  |  |        |      | 1.46E-02 | ↓EDN1                                                                                          |
| nandrolone decanoate               | chemical drug                     |  |        |      | 1.46E-02 | ↓GABRA5                                                                                        |

|                                               |                             |  |  |  |          |                        |
|-----------------------------------------------|-----------------------------|--|--|--|----------|------------------------|
| testosterone cypionate                        | chemical drug               |  |  |  | 1.46E-02 | ↓GABRA5                |
| Go 6976                                       | chemical - kinase inhibitor |  |  |  | 1.52E-02 | ↓ERBB2, ↓TRAF2         |
| KLF5                                          | transcription regulator     |  |  |  | 1.63E-02 | ↓CGREF1, ↓KLF5         |
| MED1                                          | transcription regulator     |  |  |  | 1.73E-02 | ↓CHAF1A, ↓ERBB2, ↓TET2 |
| CLOCK                                         | transcription regulator     |  |  |  | 1.73E-02 | ↑FKBP5, ↑MGAT2, ↓PER1  |
| GHRL                                          | growth factor               |  |  |  | 1.81E-02 | ↓EDN1, ↓POU1F1         |
| darusentan                                    | chemical drug               |  |  |  | 1.83E-02 | ↓EDN1                  |
| Gata                                          | group                       |  |  |  | 1.83E-02 | ↓EDN1                  |
| miR-148a-3p (and other miRNAs w/seed CAGUGCA) | mature microrna             |  |  |  | 1.83E-02 | ↓NR1I2                 |
| CITED1                                        | transcription regulator     |  |  |  | 1.83E-02 | ↓ERBB2                 |
| GPR37                                         | g-protein coupled receptor  |  |  |  | 1.83E-02 | ↑PARK2                 |
| miconazole                                    | chemical drug               |  |  |  | 1.83E-02 | ↓NR1I2                 |
| methyltestosterone                            | chemical drug               |  |  |  | 1.83E-02 | ↓GABRA5                |
| vorinostat                                    | chemical drug               |  |  |  | 1.93E-02 | ↓EDN1, ↓ERBB2, ↓TRAF2  |
| GSK690693                                     | chemical drug               |  |  |  | 2.19E-02 | ↓ERBB2                 |
| Ampa Receptor                                 | complex                     |  |  |  | 2.19E-02 | ↓ERBB2                 |
| STC1                                          | kinase                      |  |  |  | 2.19E-02 | ↓POU1F1                |
| BDKRB1                                        | g-protein coupled receptor  |  |  |  | 2.19E-02 | ↓EDN1                  |
| LRIG1                                         | other                       |  |  |  | 2.19E-02 | ↓ERBB2                 |
| DNAJA3                                        | other                       |  |  |  | 2.19E-02 | ↓ERBB2                 |
| ERBB2IP                                       | other                       |  |  |  | 2.19E-02 | ↓ERBB2                 |
| MUSK                                          | kinase                      |  |  |  | 2.19E-02 | ↓ERBB2                 |
| SERPIND1                                      | other                       |  |  |  | 2.19E-02 | ↓KLF5                  |
| HLA-B                                         | transmembrane receptor      |  |  |  | 2.19E-02 | ↓EDN1                  |
| tyrphostin AG825                              | chemical - kinase inhibitor |  |  |  | 2.19E-02 | ↓ERBB2                 |
| canrenoate potassium                          | chemical drug               |  |  |  | 2.19E-02 | ↓EDN1                  |

|                                      |                             |  |        |  |          |                                         |
|--------------------------------------|-----------------------------|--|--------|--|----------|-----------------------------------------|
| R5020                                | chemical reagent            |  |        |  | 2.33E-02 | ↓ERBB2, ↑FKBP5                          |
| SIRT1                                | transcription regulator     |  |        |  | 2.34E-02 | ↑MGAT2, ↓PER1, ↓TRAF2                   |
| NRG2                                 | growth factor               |  |        |  | 2.39E-02 | ↓EDN1, ↓ERBB2                           |
| calcitriol                           | chemical drug               |  | -1.000 |  | 2.50E-02 | ↓CHAF1A, ↓EDN1, ↓ERBB2, ↑NUP43, ↓POU1F1 |
| Arnt-Hif1a                           | complex                     |  |        |  | 2.55E-02 | ↓EDN1                                   |
| REL/RELA/RELB                        | group                       |  |        |  | 2.55E-02 | ↓TRAF2                                  |
| WP1066                               | chemical drug               |  |        |  | 2.55E-02 | ↓EDN1                                   |
| KDM3A                                | transcription regulator     |  |        |  | 2.55E-02 | ↓EDN1                                   |
| enzalutamide                         | chemical drug               |  |        |  | 2.55E-02 | ↑FKBP5                                  |
| miR-138-5p (miRNAs w/seed GCUGGUG)   | mature microRNA             |  |        |  | 2.55E-02 | ↓ROCK2                                  |
| MLLT3                                | other                       |  |        |  | 2.55E-02 | ↓EDN1                                   |
| NPAS2                                | transcription regulator     |  |        |  | 2.55E-02 | ↓PER1                                   |
| Elf5                                 | other                       |  |        |  | 2.55E-02 | ↓ERBB2                                  |
| EWSR1                                | other                       |  |        |  | 2.55E-02 | ↓ERBB2                                  |
| diazepam                             | chemical drug               |  |        |  | 2.55E-02 | ↓PER1                                   |
| PP2/AG1879 tyrosine kinase inhibitor | chemical - kinase inhibitor |  |        |  | 2.75E-02 | ↓EDN1, ↓PER1                            |
| PLG                                  | peptidase                   |  |        |  | 2.89E-02 | ↓EDN1, ↓NOD1                            |
| FLT1                                 | kinase                      |  |        |  | 2.89E-02 | ↓APLP2, ↓TNIP1                          |
| novobiocin                           | chemical drug               |  |        |  | 2.91E-02 | ↓ERBB2                                  |
| PROP1                                | transcription regulator     |  |        |  | 2.91E-02 | ↓POU1F1                                 |
| FRS2                                 | other                       |  |        |  | 2.91E-02 | ↓ERBB2                                  |
| SFN                                  | other                       |  |        |  | 2.91E-02 | ↓ERBB2                                  |
| YBX3                                 | transcription regulator     |  |        |  | 2.91E-02 | ↓ERBB2                                  |
| CRTC1                                | transcription regulator     |  |        |  | 2.91E-02 | ↓PER1                                   |
| PA2G4                                | transcription regulator     |  |        |  | 2.91E-02 | ↓ERBB2                                  |
| diltiazem                            | chemical drug               |  |        |  | 2.91E-02 | ↓EDN1                                   |

|                            |                                 |  |  |  |          |                         |
|----------------------------|---------------------------------|--|--|--|----------|-------------------------|
| cerulenin                  | chemical drug                   |  |  |  | 2.91E-02 | ↓ERBB2                  |
| RHOA                       | enzyme                          |  |  |  | 3.12E-02 | ↓ERBB2, ↓ROCK2          |
| HTR7                       | g-protein coupled receptor      |  |  |  | 3.26E-02 | ↓STAB1                  |
| HTR2B                      | g-protein coupled receptor      |  |  |  | 3.26E-02 | ↓ERBB2                  |
| NEK7                       | kinase                          |  |  |  | 3.26E-02 | ↓EDN1                   |
| LHX3                       | transcription regulator         |  |  |  | 3.26E-02 | ↓POU1F1                 |
| ERP29                      | transporter                     |  |  |  | 3.26E-02 | ↓PARD3                  |
| TRAF1                      | other                           |  |  |  | 3.26E-02 | ↓TRAF2                  |
| benazepril                 | chemical drug                   |  |  |  | 3.26E-02 | ↓EDN1                   |
| farglitazar                | chemical drug                   |  |  |  | 3.26E-02 | ↓EDN1                   |
| betaine                    | chemical - endogenous mammalian |  |  |  | 3.26E-02 | ↓MIOX                   |
| spironolactone             | chemical drug                   |  |  |  | 3.27E-02 | ↓EDN1, ↓POU1F1          |
| beraprost                  | chemical drug                   |  |  |  | 3.62E-02 | ↓EDN1                   |
| mGluR                      | group                           |  |  |  | 3.62E-02 | ↓ERBB2                  |
| Atrial Natriuretic Peptide | group                           |  |  |  | 3.62E-02 | ↓EDN1                   |
| BMS-754807                 | chemical drug                   |  |  |  | 3.62E-02 | ↓ERBB2                  |
| MXD1                       | transcription regulator         |  |  |  | 3.62E-02 | ↓EDN1                   |
| ZFHX3                      | transcription regulator         |  |  |  | 3.62E-02 | ↓POU1F1                 |
| MIR320                     | group                           |  |  |  | 3.62E-02 | ↓EDN1                   |
| RV 538                     | chemical reagent                |  |  |  | 3.62E-02 | ↓ATP13A2                |
| levamisole                 | chemical drug                   |  |  |  | 3.62E-02 | ↓EDN1                   |
| BQ-788                     | chemical drug                   |  |  |  | 3.62E-02 | ↓EDN1                   |
| FN1                        | enzyme                          |  |  |  | 3.62E-02 | ↓APLP2, ↓PPP6R2, ↓TNIP1 |
| FOXP3                      | transcription regulator         |  |  |  | 3.92E-02 | ↓CHAF1A, ↓ERBB2         |
| sorbitol                   | chemical - endogenous mammalian |  |  |  | 3.97E-02 | ↓MIOX                   |
| WHSC1                      | enzyme                          |  |  |  | 3.97E-02 | ↓BACE2                  |

|                          |                                 |        |      |  |          |                                          |
|--------------------------|---------------------------------|--------|------|--|----------|------------------------------------------|
| hemoglobin               | complex                         |        |      |  | 3.97E-02 | ↓EDN1                                    |
| WDR5                     | other                           |        |      |  | 3.97E-02 | ↓ERBB2                                   |
| HIF3A                    | transcription regulator         |        |      |  | 3.97E-02 | ↓EDN1                                    |
| XRCC5                    | enzyme                          |        |      |  | 3.97E-02 | ↑FKBP5                                   |
| ELK3                     | transcription regulator         |        |      |  | 3.97E-02 | ↓ERBB2                                   |
| toremifene               | chemical drug                   |        |      |  | 3.97E-02 | ↓ERBB2                                   |
| catecholamine            | chemical - other                |        |      |  | 3.97E-02 | ↓ERBB2                                   |
| baclofen                 | chemical drug                   |        |      |  | 3.97E-02 | ↓PER1                                    |
| KT5823                   | chemical - kinase inhibitor     |        |      |  | 3.97E-02 | ↓EDN1                                    |
| Pkc(s)                   | group                           |        |      |  | 4.00E-02 | ↓EDN1, ↓PER1, ↓POU1F1                    |
| HIST1H1T                 | other                           |        |      |  | 4.00E-02 | ↓PCCB, ↓SMARCE1                          |
| Hist1h1a                 | other                           |        |      |  | 4.00E-02 | ↓PCCB, ↓SMARCE1                          |
| cycloheximide            | chemical reagent                |        |      |  | 4.17E-02 | ↓EDN1, ↓KLF5, ↓POU1F1, ↓TNIP1            |
| triamcinolone acetonide  | chemical drug                   |        |      |  | 4.25E-02 | ↓DGKE, ↑FKBP5, ↓PER1                     |
| LMNA                     | other                           |        |      |  | 4.25E-02 | ↓EDN1, ↓EFNB3, ↓STAB1                    |
| actinomycin D            | chemical drug                   |        |      |  | 4.25E-02 | ↓EDN1, ↓POU1F1, ↓ROCK2                   |
| PARP1                    | enzyme                          |        |      |  | 4.26E-02 | ↓ERBB2, ↑FKBP5                           |
| GATA5                    | transcription regulator         |        |      |  | 4.33E-02 | ↓EDN1                                    |
| metoprolol               | chemical drug                   |        |      |  | 4.33E-02 | ↓EDN1                                    |
| androstenediol           | chemical - endogenous mammalian |        |      |  | 4.33E-02 | ↑FKBP5                                   |
| dihydrotestosterone      | chemical - endogenous mammalian | 0.372  | bias |  | 4.34E-02 | ↓ATP13A2, ↓ERBB2, ↑FKBP5, ↓PER1, ↓SLC7A8 |
| NRG1                     | growth factor                   |        |      |  | 4.35E-02 | ↓EDN1, ↓ERBB2, ↓PCCB                     |
| NKX2-3                   | transcription regulator         |        |      |  | 4.45E-02 | ↓EDN1, ↓FAM172A, ↓SHMT2                  |
| tetrachlorodibenzodioxin | chemical toxicant               |        |      |  | 4.54E-02 | ↓EDN1, ↓EPS15L1, ↓ERBB2, ↓PRCC           |
| CREB1                    | transcription                   | -1.067 |      |  | 4.55E-02 | ↓CGREF1, ↓EDN1, ↓GABRA5,                 |

|                                 |                                 |  |  |  |          |                |
|---------------------------------|---------------------------------|--|--|--|----------|----------------|
|                                 | regulator                       |  |  |  |          | ↓KLF5, ↓PER1   |
| alvespimycin                    | chemical drug                   |  |  |  | 4.68E-02 | ↓ERBB2         |
| COL1A1                          | other                           |  |  |  | 4.68E-02 | ↓EDN1          |
| XRCC6                           | enzyme                          |  |  |  | 4.68E-02 | ↑FKBP5         |
| PER2                            | transcription regulator         |  |  |  | 4.68E-02 | ↓PER1          |
| LPAR1                           | g-protein coupled receptor      |  |  |  | 4.68E-02 | ↓KLF5          |
| CRY2                            | enzyme                          |  |  |  | 4.68E-02 | ↓PER1          |
| CRY1                            | enzyme                          |  |  |  | 4.68E-02 | ↓PER1          |
| clasto-lactacystin beta-lactone | chemical - protease inhibitor   |  |  |  | 4.68E-02 | ↓NR1I2         |
| hyperforin                      | chemical drug                   |  |  |  | 4.68E-02 | ↓NR1I2         |
| naltrindole                     | chemical drug                   |  |  |  | 4.68E-02 | ↓CDK16         |
| L-glutamic acid                 | chemical - endogenous mammalian |  |  |  | 4.79E-02 | ↓PER1, ↓ROCK2  |
| CDX2                            | transcription regulator         |  |  |  | 4.97E-02 | ↓KLF5, ↓SLC7A8 |



**Supplementary Table 12** Primer sequences, annealing temperatures and product sizes for PCR reactions.

| Gene Symbol      | Accession number | Primer sequence                 |                                      | Annealing Temperature | Product length |
|------------------|------------------|---------------------------------|--------------------------------------|-----------------------|----------------|
|                  |                  | Forward                         | Reverse                              |                       |                |
| mtDNA            | AJ002189         | CTC AAC CCT AGC AGA AAC CA      | TTA GTT GGT CGT ATC GGA ATC          | 55                    | 254            |
| ACT-B            | XM_003124280.3   | GTGGACATCAGGAAGGACCTCTA         | ATGATCTTGATCTTCATGGTGCT              | 60                    | 130            |
| OCT4<br>(POU5F1) | NM_001113060     | CACCTCAGGTCGGAGTG               | AGCTTGGCAAATTGTTCGA                  | 58                    | 226            |
| SOX2             | NM_001123197.1   | AACCAGAAGAACAGCCCAGA            | CGGGGCCGGTATTTATAATC                 | 58                    | 246            |
| REX1             | XM_003359865     | TTTCTGAGTACGTGCCAGGCAA          | GAACGGAGAGATGCTTTCTCAGAG             | 62                    | 201            |
| Nanog            | NM_001129971.1   | AGGGCTCAGCCAGTACAGAA            | TGATTTTCCCCAGCAGTTTC                 | 60                    | 316            |
| CDX2             | NM_001278769.1   | CTCGGCAGCCAAGTGAAA              | TCCTCTCCTTCGCTCTGC                   | 62                    | 198            |
| ND1              | NC_000845.1      | CGGACCTTTCGCCATATT              | GTATCGGAATCGTGGGTATG                 | 60                    | 195            |
| ATP6             | NC_000845.1      | CACCCACCACACA ACTATC            | CTAGGGCTACTGGTTGAATAAA               | 60                    | 191            |
| TFAM             | NM_001130211.1   | CCT TTC CAC ATA CAA CCA<br>TCGA | TCC AGA ACT CAT CTT GGT AAA<br>TTC C | 62                    | 80             |

## Supplementary Figures

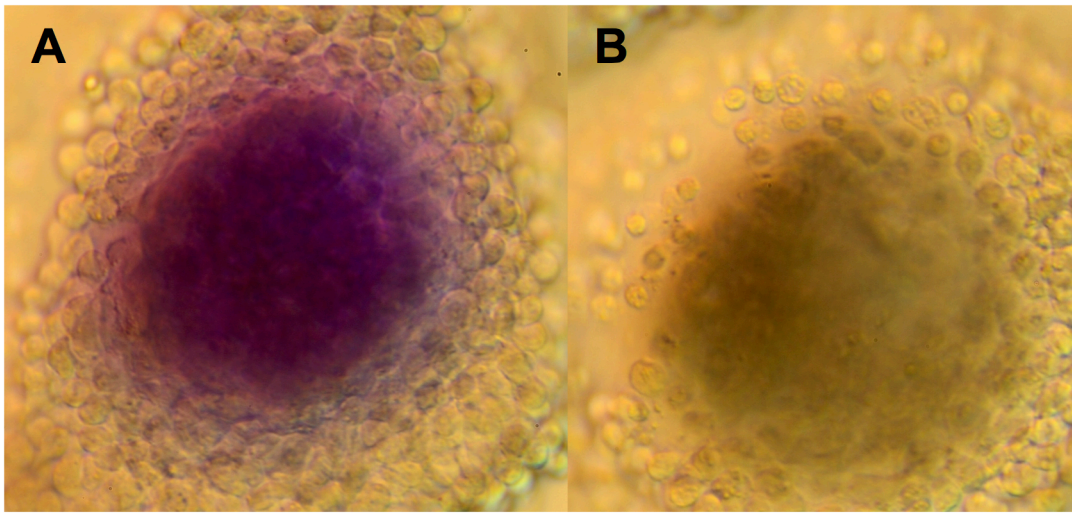

**Supplementary Figure 1** Brilliant Cresyl Blue (BCB) staining of cumulus-oocyte complexes before IVM. BCB dye is retained in BCB<sup>+</sup> oocytes (**a**) and reduced to a colourless compound in BCB<sup>-</sup> oocytes (**b**).

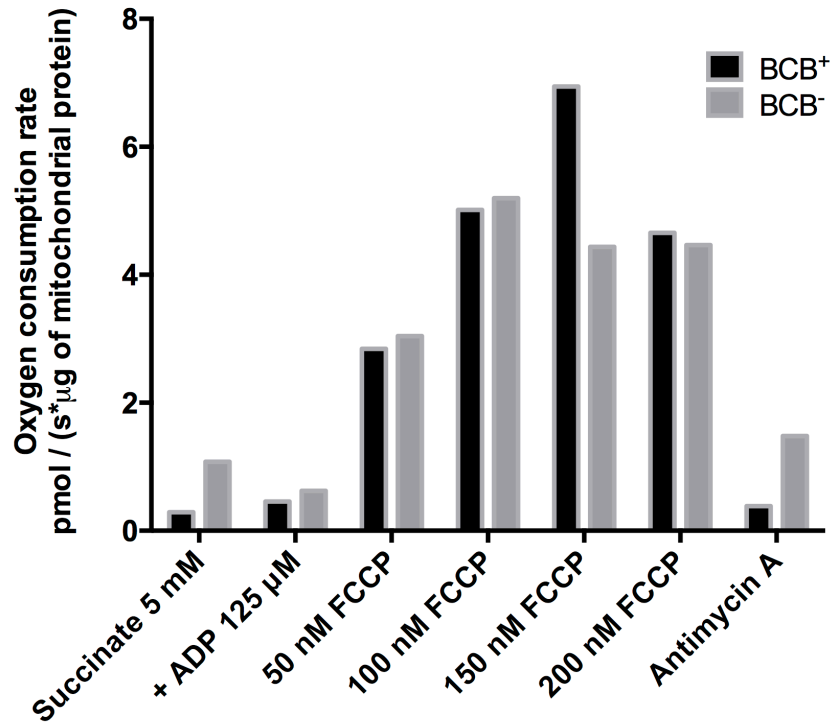

**Supplementary Figure 2** O<sub>2</sub> consumption rates for mitochondrial extracts isolated from BCB<sup>+</sup> and BCB<sup>-</sup> oocytes after 44hr of IVM. Mitochondrial extracts were subjected to 5 mM succinate, followed by ADP and increased FCCP concentrations (50 nM increments). Respiration was abolished by addition of Antimycin A.

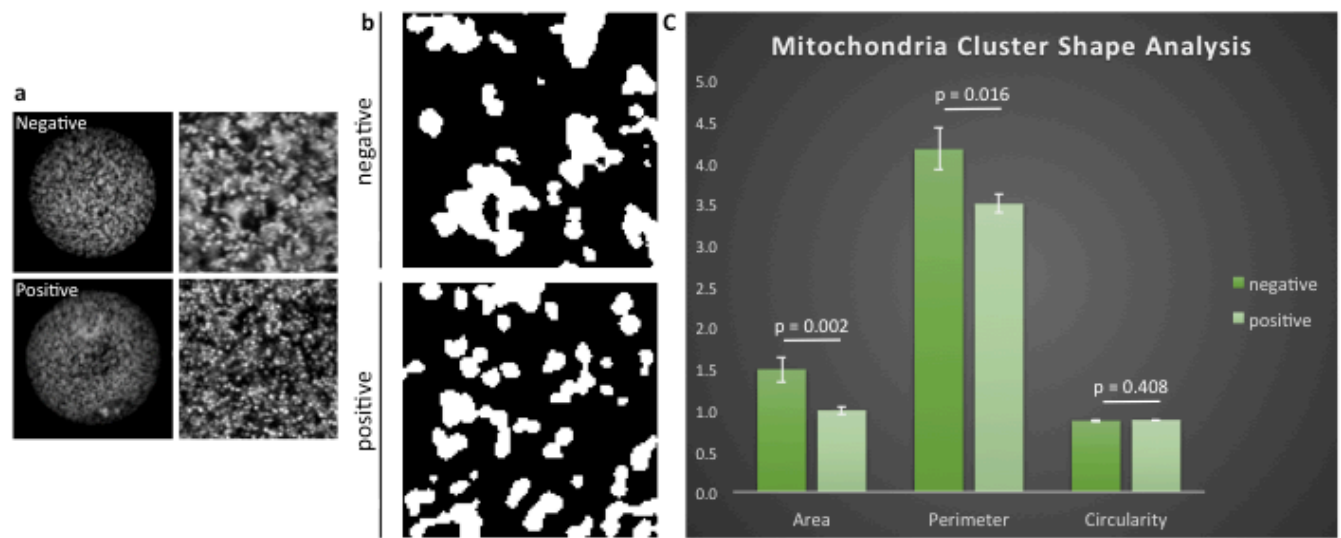

**Supplementary Figure 3** Shape analysis of mitochondrial clusters. a)  $BCB^-$  and  $BCB^+$  MII oocytes are stained with MitoTracker Red. b) Region of interests (ROIs) were thresholded and binarized. Cluster area, perimeter and circularity were chosen as parameters for characterization. c) Cluster analysis was performed using two-tailed t-test.

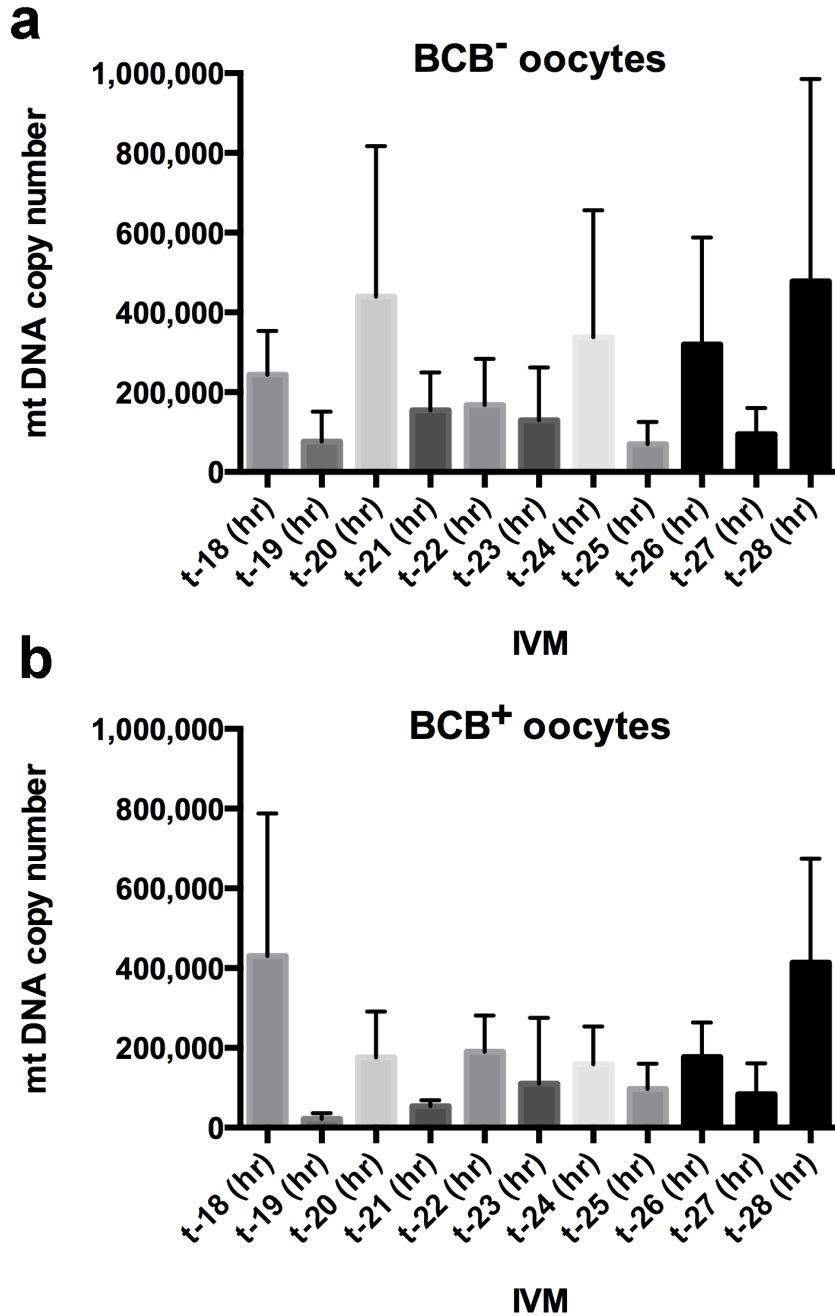

**Supplementary Figure 4** Mean ( $\pm$  SEM) of mtDNA copy number for BCB<sup>+</sup> (a) and BCB<sup>-</sup> (b) oocytes. Oocytes were collected every hour between 18h and 28h of IVM (n = 5-10 oocytes per time point).

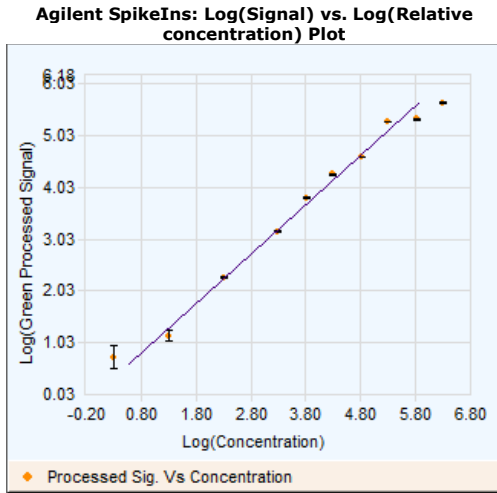

| <b>Agilent Spike-In Concentration-Response Statistics Linear Range Statistics</b> |      |
|-----------------------------------------------------------------------------------|------|
| Low Signal                                                                        | 0.61 |
| High Signal                                                                       | 5.68 |
| Low Relative Concentration                                                        | 0.59 |
| High Relative Concentration                                                       | 5.89 |
| Slope                                                                             | 0.96 |
| R <sup>2</sup> Value                                                              | 0.99 |

| <b>Signal Detection Limit Statistics</b> |      |
|------------------------------------------|------|
| Saturation Point                         | 5.89 |
| Low Threshold                            | 0.31 |
| Low Threshold Error                      | 0.24 |
| Spike-In Detection Limit                 | 1.04 |

**Supplementary Figure 5** Correlation between exogenous spike-in RNA concentrations added to the sample and detected by microarray. The microarray is designed with probes to detect different RNA spike-ins that are added at known concentrations (Concentration) to each sample before RNA extraction. After sample and spike-in RNA extraction, total RNA was amplified to produce sufficient amounts for labelling (green) and hybridization on the microarray (Green process signal). A high correlation score indicates low technical bias in RNA processing.

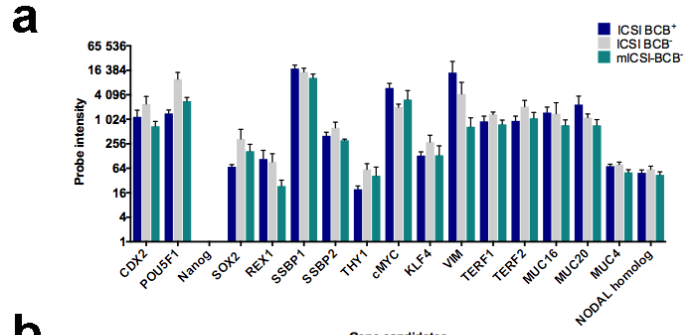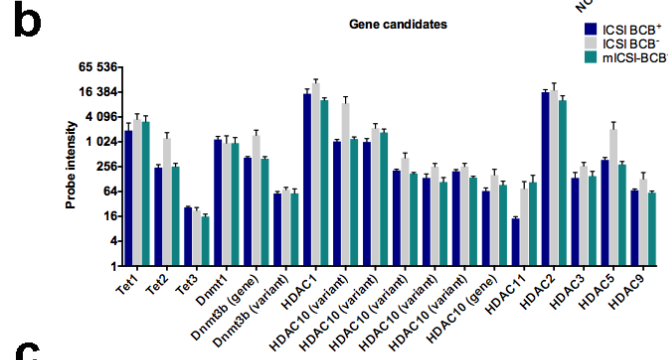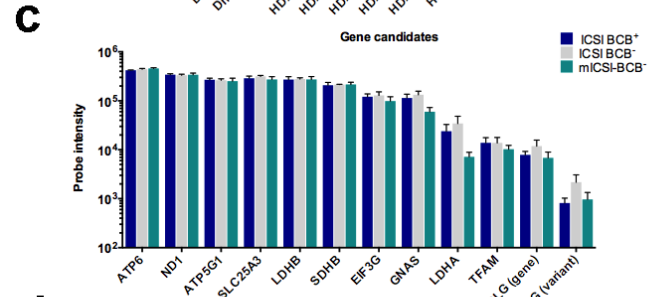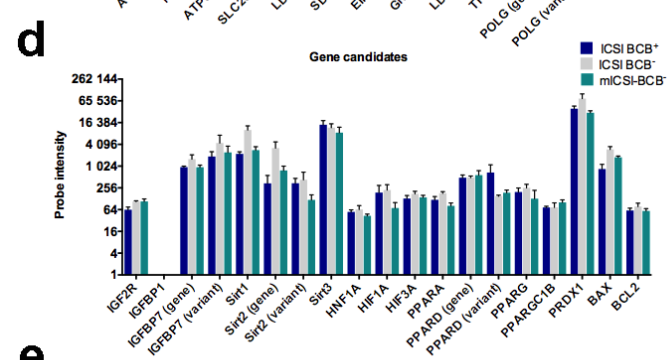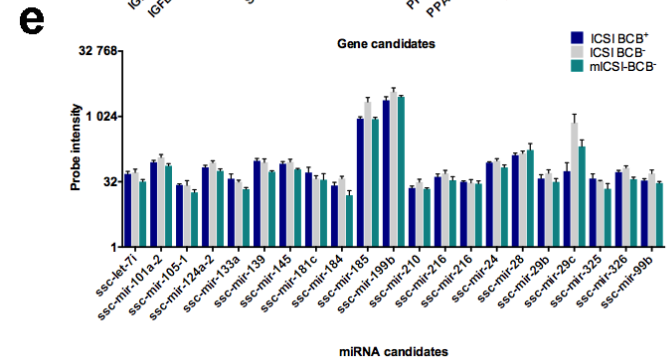

**Supplementary Figure 6** Normalized microarray intensity values for genes associated with blastocyst development for ICSI BCB<sup>+</sup>, ICSI BCB<sup>-</sup> and mICSI BCB<sup>+</sup> derived blastocysts. **a)** pluripotency; **b)** epigenetic reprogramming; **c** and **d)** energy metabolism; and **e)** microRNA genes.



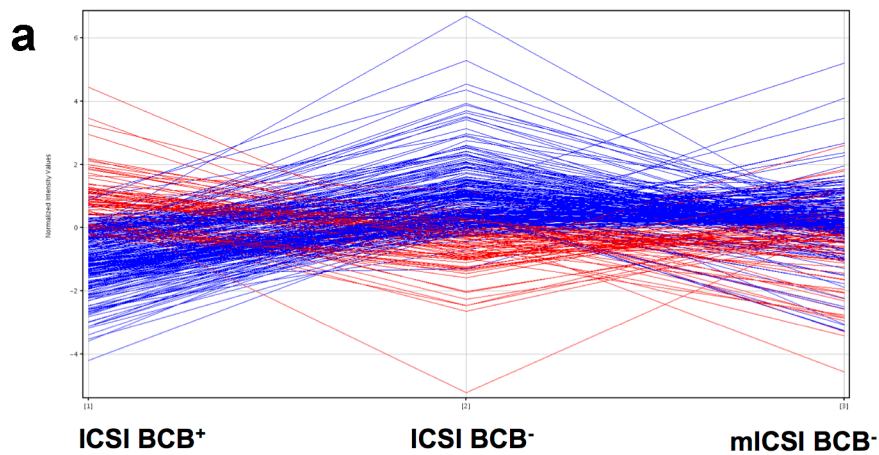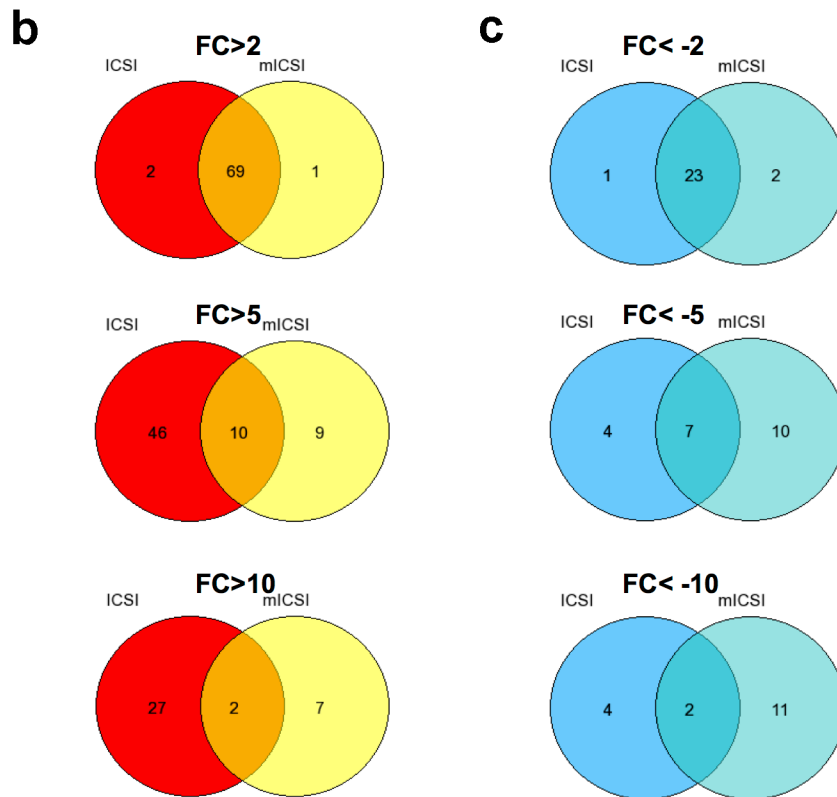

**Supplementary Figure 7** Normalized fold-change profiles for differentially expressed genes for ICSI BCB<sup>+</sup>, ICSI BCB<sup>-</sup> and mICSI BCB<sup>-</sup> derived blastocysts. **(a)** Analysis was conducted using ANOVA, FC > 2 (abs) p < 0.01. **(b)** Number of up-regulated and **(c)** down-regulated genes in ICSI BCB<sup>-</sup> and mICSI BCB<sup>-</sup> blastocysts at p < 0.01 (FC relative to BCB<sup>+</sup> ICSI).

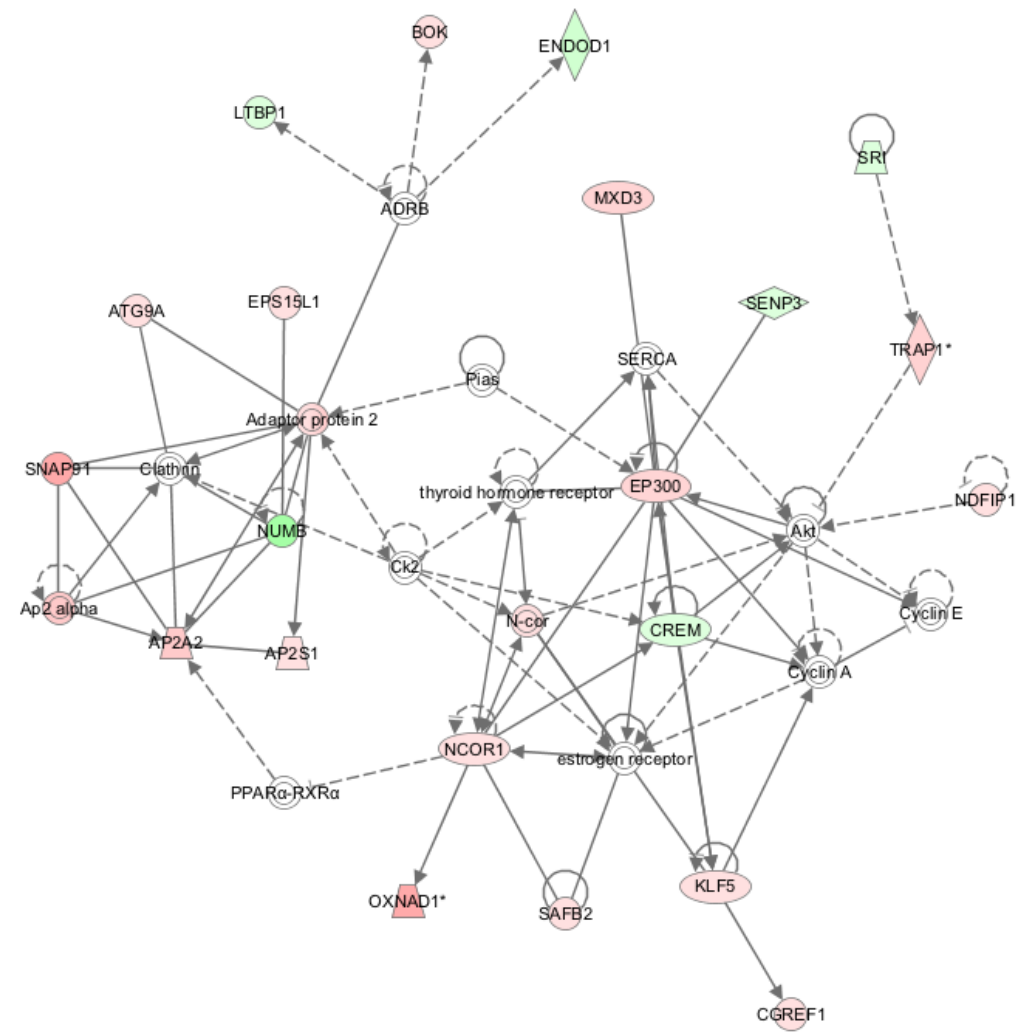

**Supplementary Figure 8** Differentially expressed genes between ICSI BCB<sup>-</sup> and ICSI BCB<sup>+</sup> blastocysts affecting the cellular assembly and organisation network. A comparison of differentially expressed genes between ICSI BCB<sup>-</sup> and ICSI BCB<sup>+</sup> blastocysts demonstrated the up (red) and down (green) regulation of gene expression for ICSI BCB<sup>-</sup> blastocysts.

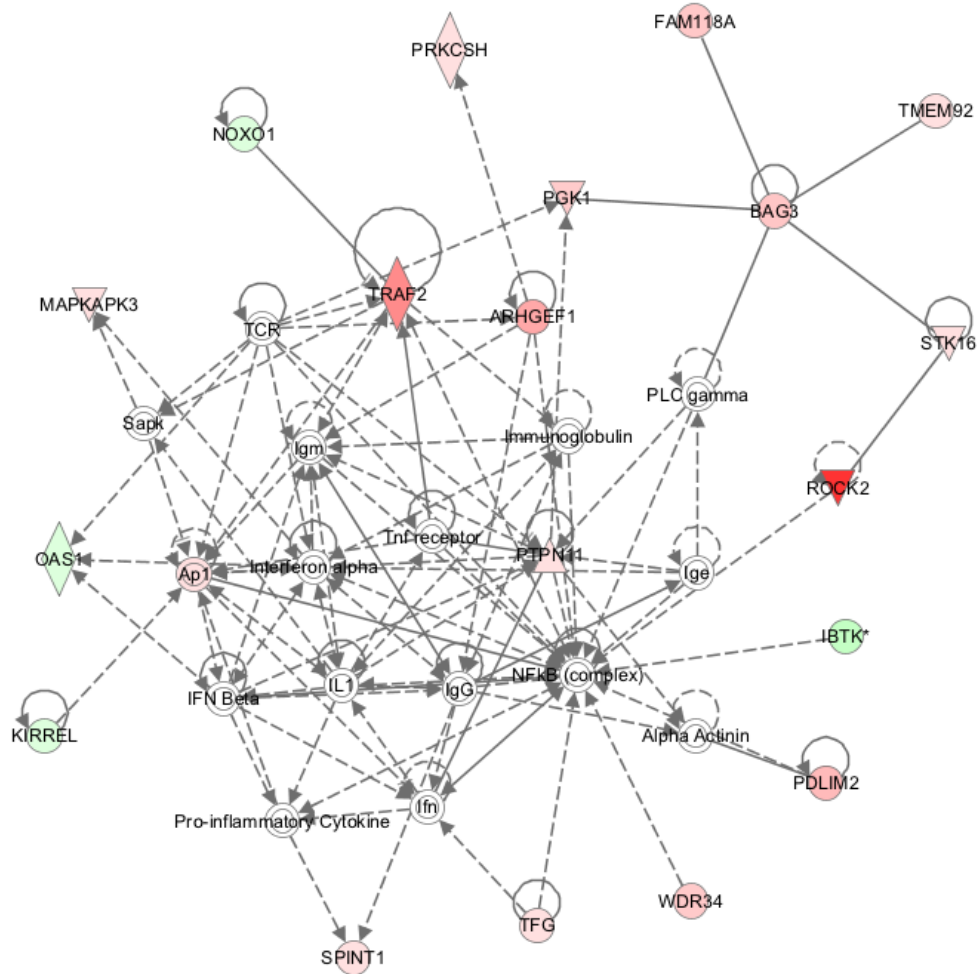

**Supplementary Figure 9** Differentially expressed genes between ICSI BCB<sup>-</sup> and ICSI BCB<sup>+</sup> blastocysts affecting the cell morphology network. A comparison of differentially expressed genes between ICSI BCB<sup>-</sup> and ICSI BCB<sup>+</sup> blastocysts demonstrated the up (red) and down (green) regulation of gene expression for ICSI BCB<sup>-</sup> blastocysts.

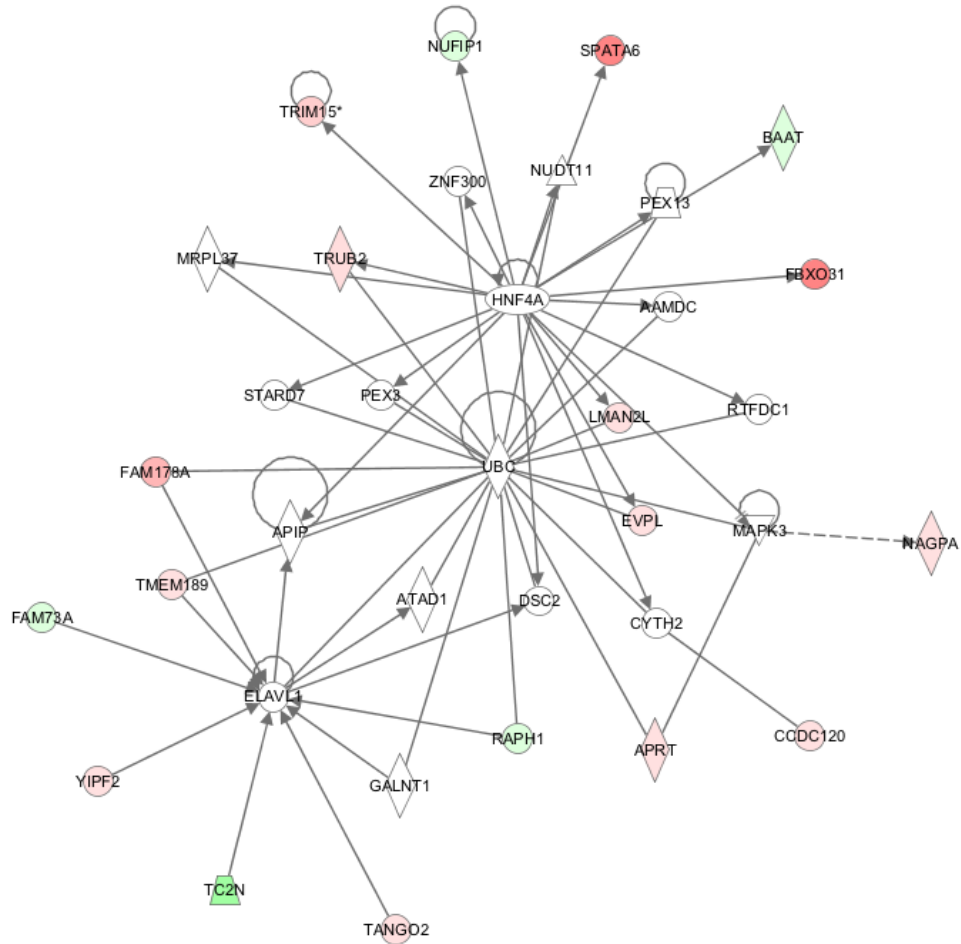

**Supplementary Figure 10** Differentially expressed genes between ICSI BCB<sup>-</sup> and ICSI BCB<sup>+</sup> blastocysts affecting the amino acid metabolism network. A comparison of differentially expressed genes between ICSI BCB<sup>-</sup> and ICSI BCB<sup>+</sup> blastocysts demonstrated the up (red) and down (green) regulation of gene expression for ICSI BCB<sup>-</sup> blastocysts.

■ 2 vs1 (BCB effect) - 2014-08-14 10:50 AM    ■ Ratio

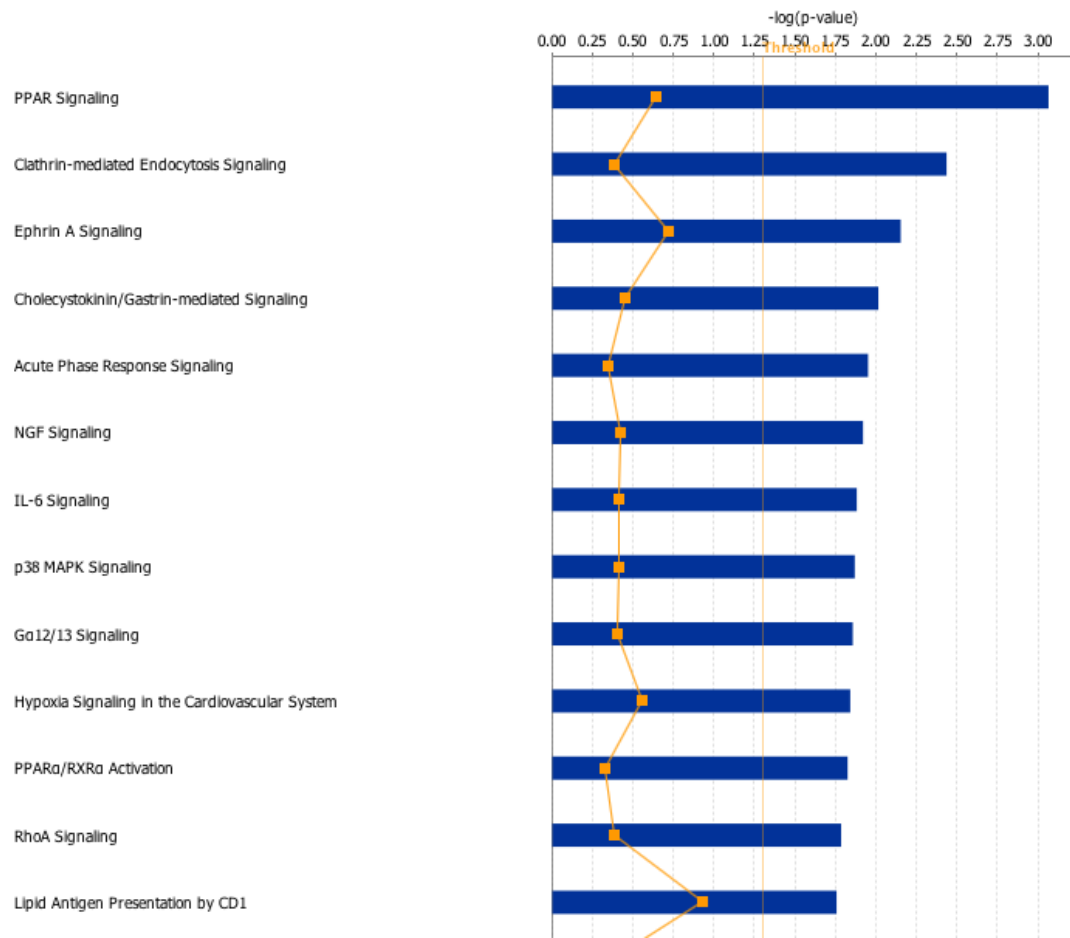

**Supplementary Figure 11** Canonical pathways significantly enriched in differentially expressed genes between ICSI BCB<sup>-</sup> and ICSI BCB<sup>+</sup> blastocysts.

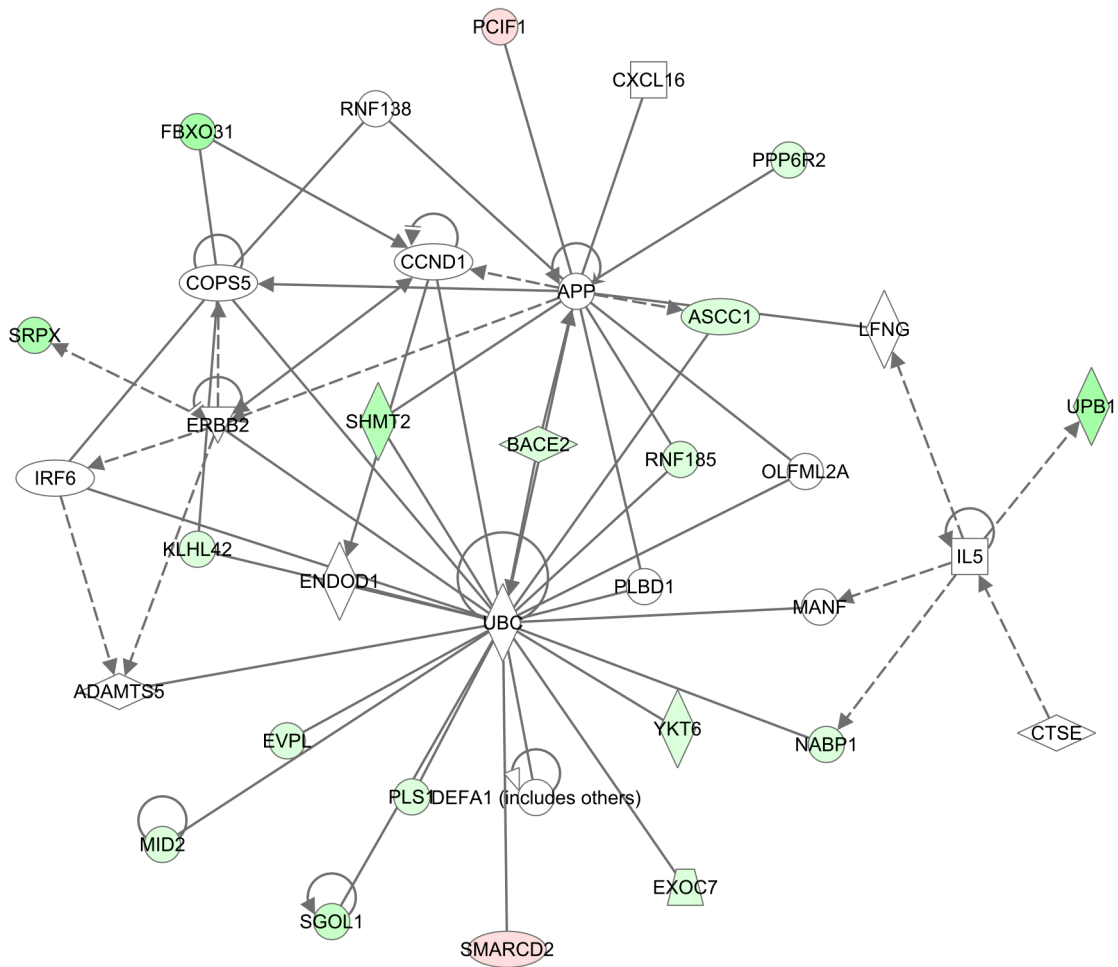

**Supplementary Figure 12** Differentially expressed genes between mICSI BCB<sup>-</sup> and ICSI BCB<sup>-</sup> blastocysts affecting the cellular movement network. A comparison of differentially expressed genes between mICSI BCB<sup>-</sup> and ICSI BCB<sup>-</sup> blastocysts demonstrated the up (red) and down (green) regulation of genes.

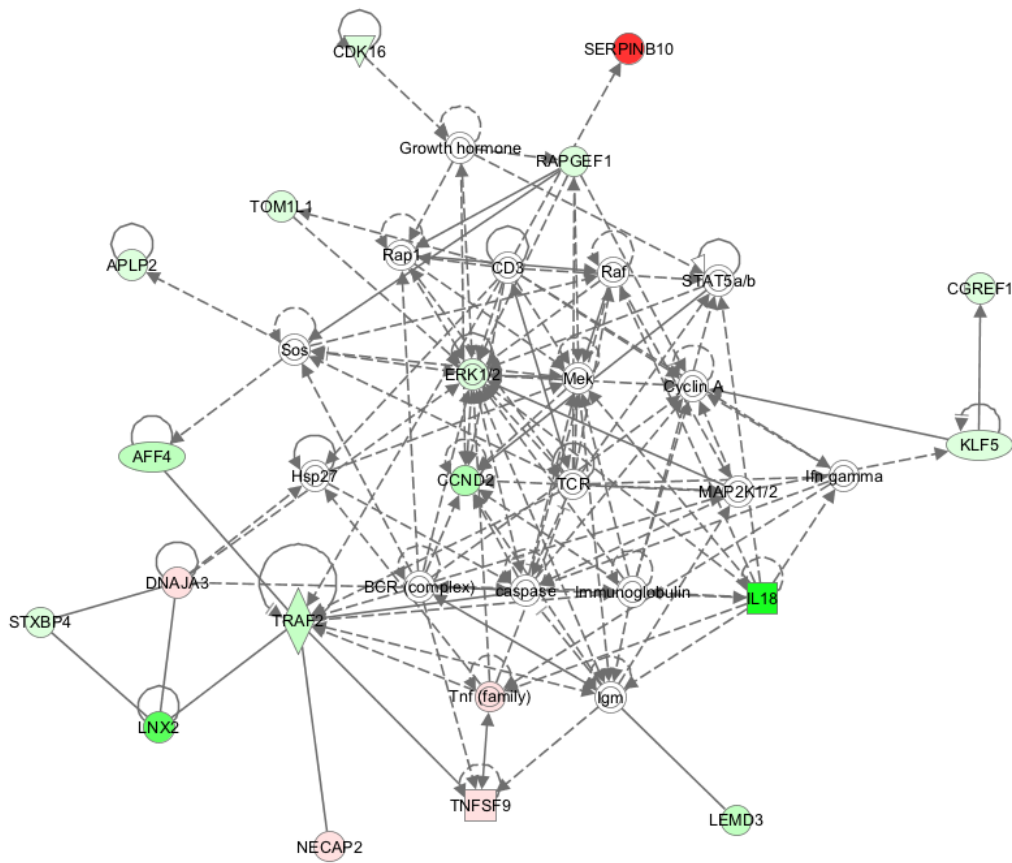

**Supplementary Figure 13** Differentially expressed genes between mICSI BCB<sup>-</sup> and ICSI BCB<sup>-</sup> blastocysts affecting the cellular development network. A comparison of differentially expressed genes between mICSI BCB<sup>-</sup> and ICSI BCB<sup>-</sup> blastocysts demonstrated the up (red) and down (green) regulation of genes.

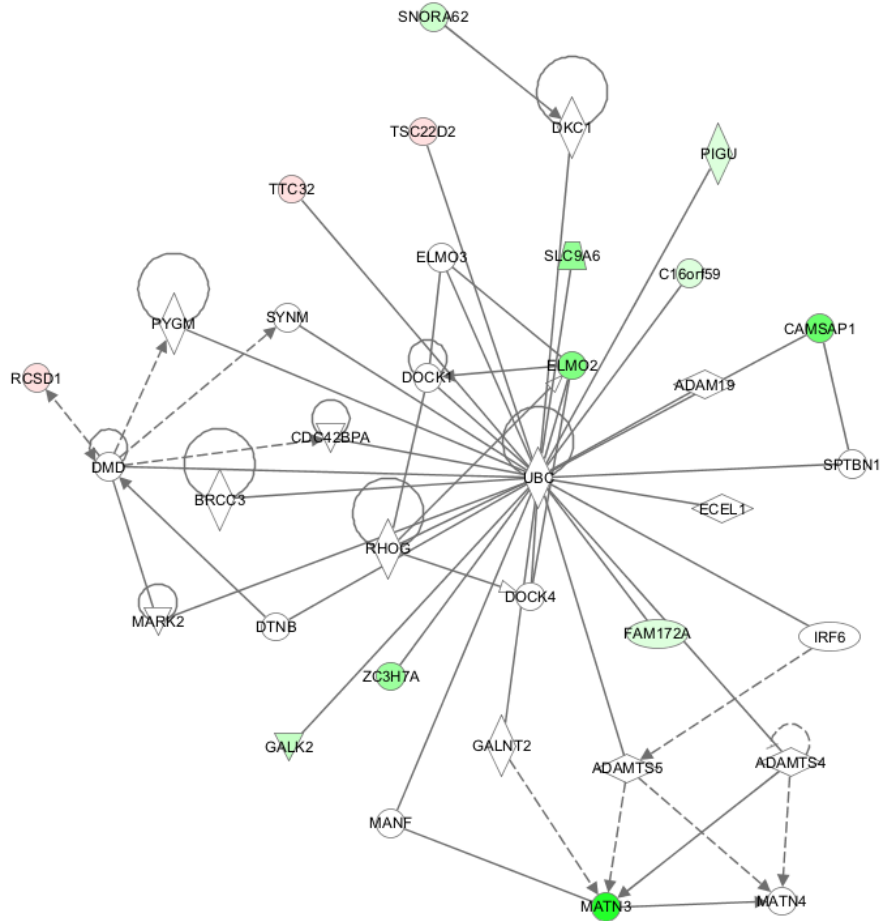

**Supplementary Figure 14** Differentially expressed genes between mICSI BCB<sup>-</sup> and ICSI BCB<sup>-</sup> blastocysts affecting the cellular morphology network. A comparison of differentially expressed genes between mICSI BCB<sup>-</sup> and ICSI BCB<sup>-</sup> blastocysts demonstrated the up (red) and down (green) regulation of genes.



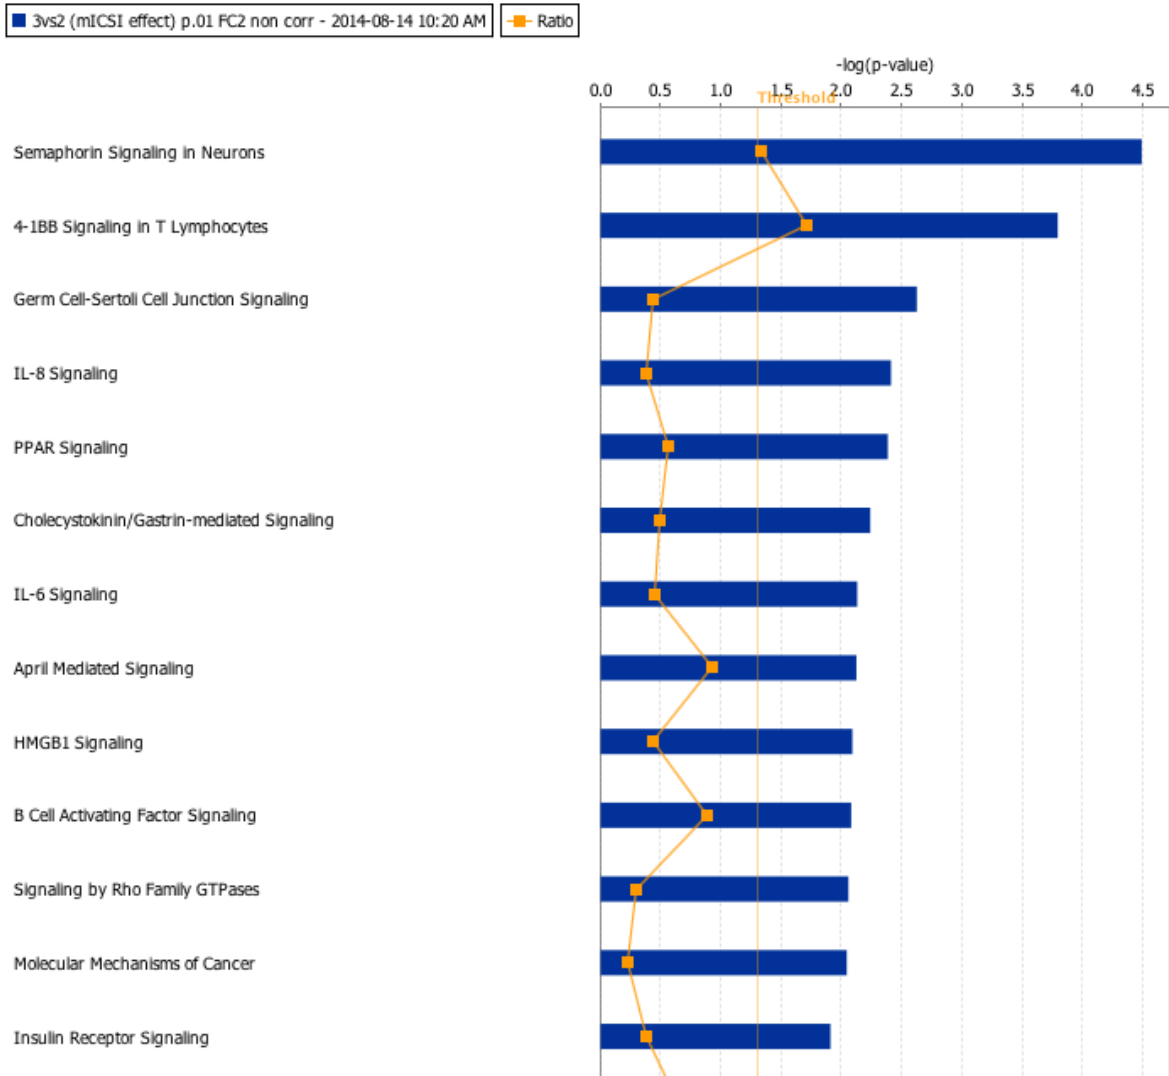

**Supplementary Figure 15** Canonical pathways significantly enriched in differentially expressed genes between mICSI BCB<sup>-</sup> and ICSI BCB<sup>-</sup> blastocysts.

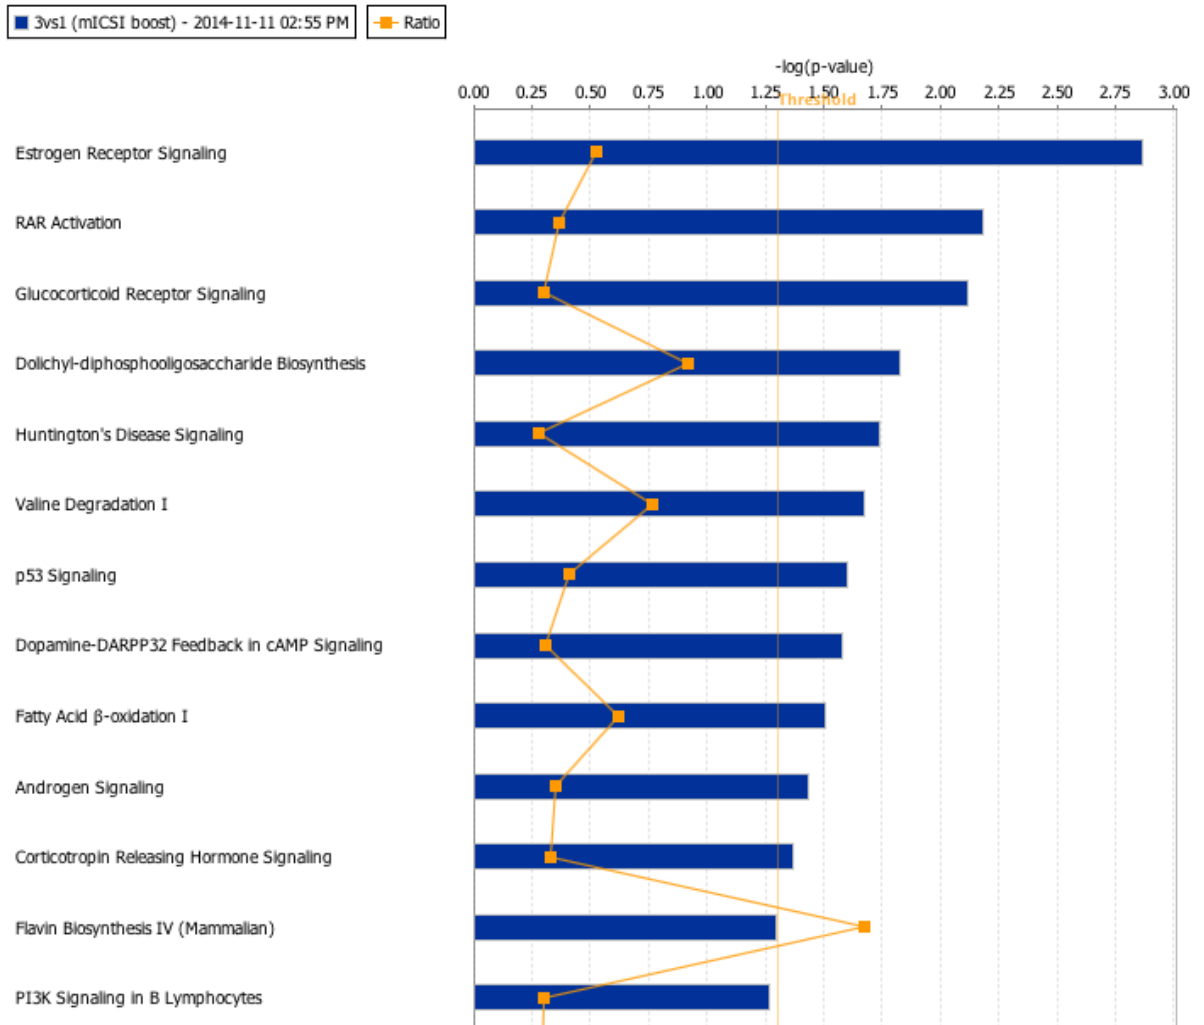

**Supplementary Figure 16** Canonical pathways significantly enriched in differentially expressed genes between mICSI BCB<sup>-</sup> and ICSI BCB<sup>+</sup> blastocysts.

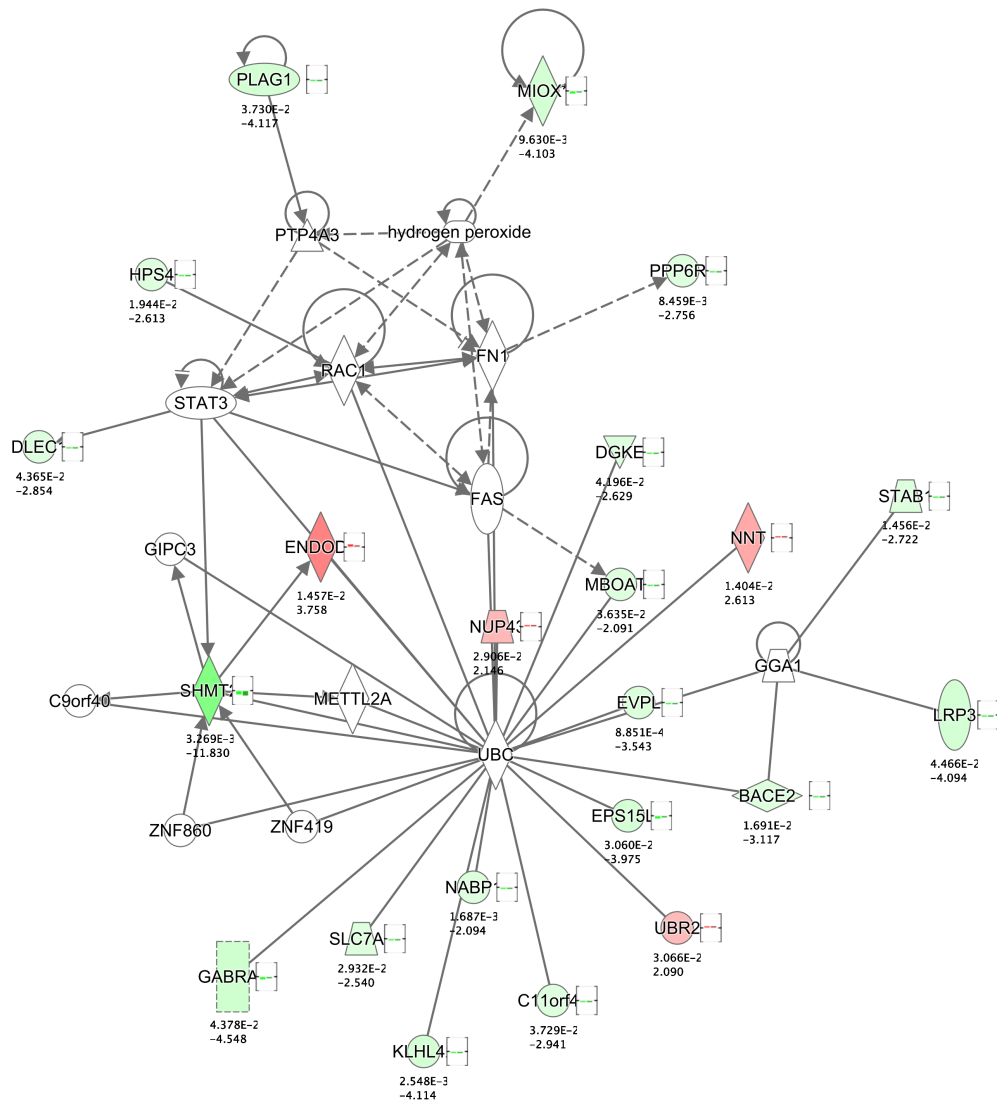

**Supplementary Figure 17** Commonly expressed genes between ICSI-BCB<sup>+</sup> and mICSI-BCB<sup>-</sup> blastocysts but different to ICSI-BCB<sup>-</sup> blastocysts affecting the cell morphology network. The comparisons between ICSI-BCB<sup>+</sup> and ICSI-BCB<sup>-</sup>, and mICSI-BCB<sup>-</sup> and ICSI-BCB<sup>-</sup> are shown by up (red) and down (green) regulation of genes. The comparisons between the two networks are overlaid to show differences in gene expression, which are indicated in the [ ].

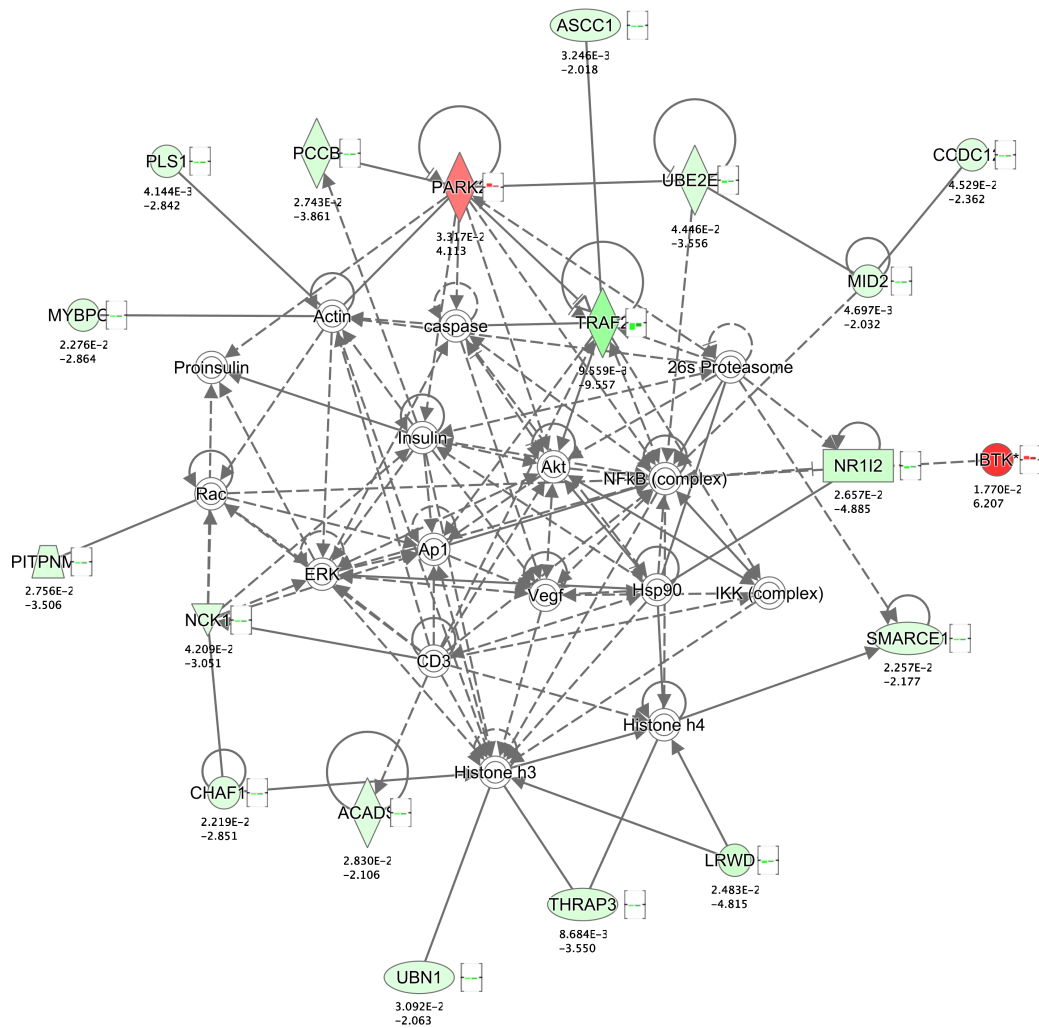

**Supplementary Figure 18** Genes commonly expressed between ICSI-BCB<sup>+</sup> and mICSI-BCB<sup>-</sup> but different to ICSI-BCB<sup>-</sup> blastocysts affecting the gene expression and protein synthesis network. The comparisons between ICSI-BCB<sup>+</sup> and ICSI-BCB<sup>-</sup> blastocysts and the mICSI-BCB<sup>-</sup> and ICSI-BCB<sup>-</sup> blastocysts are shown by the up (red) and down (green) regulation of genes. The comparisons of the two networks are overlaid to show differences in gene expression, which are indicated in the [ ].

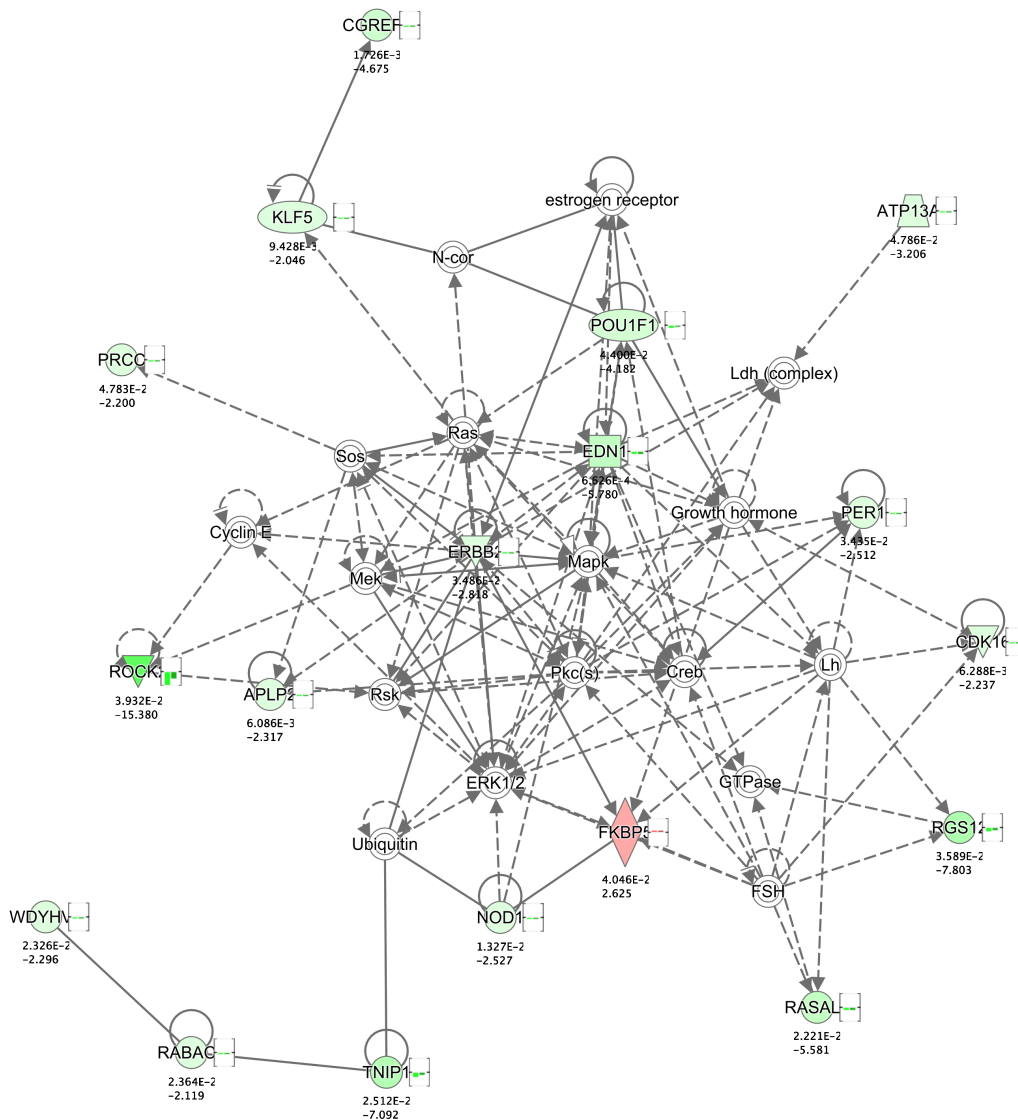

**Supplementary Figure 19** Genes which are commonly expressed between ICSI-BCB<sup>+</sup> and mICSI-BCB<sup>-</sup>, but different to ICSI-BCB<sup>-</sup> blastocysts affecting the cellular assembly and organization network. Although the comparisons between ICSI-BCB<sup>+</sup> and ICSI-BCB<sup>-</sup>, as well as mICSI-BCB<sup>-</sup> and ICSI-BCB<sup>-</sup> were very similar, shown by the up (red) and down (green) regulation of genes. The comparisons of the two network are overlaid to show differences in gene expression, which are indicated in the [ ].

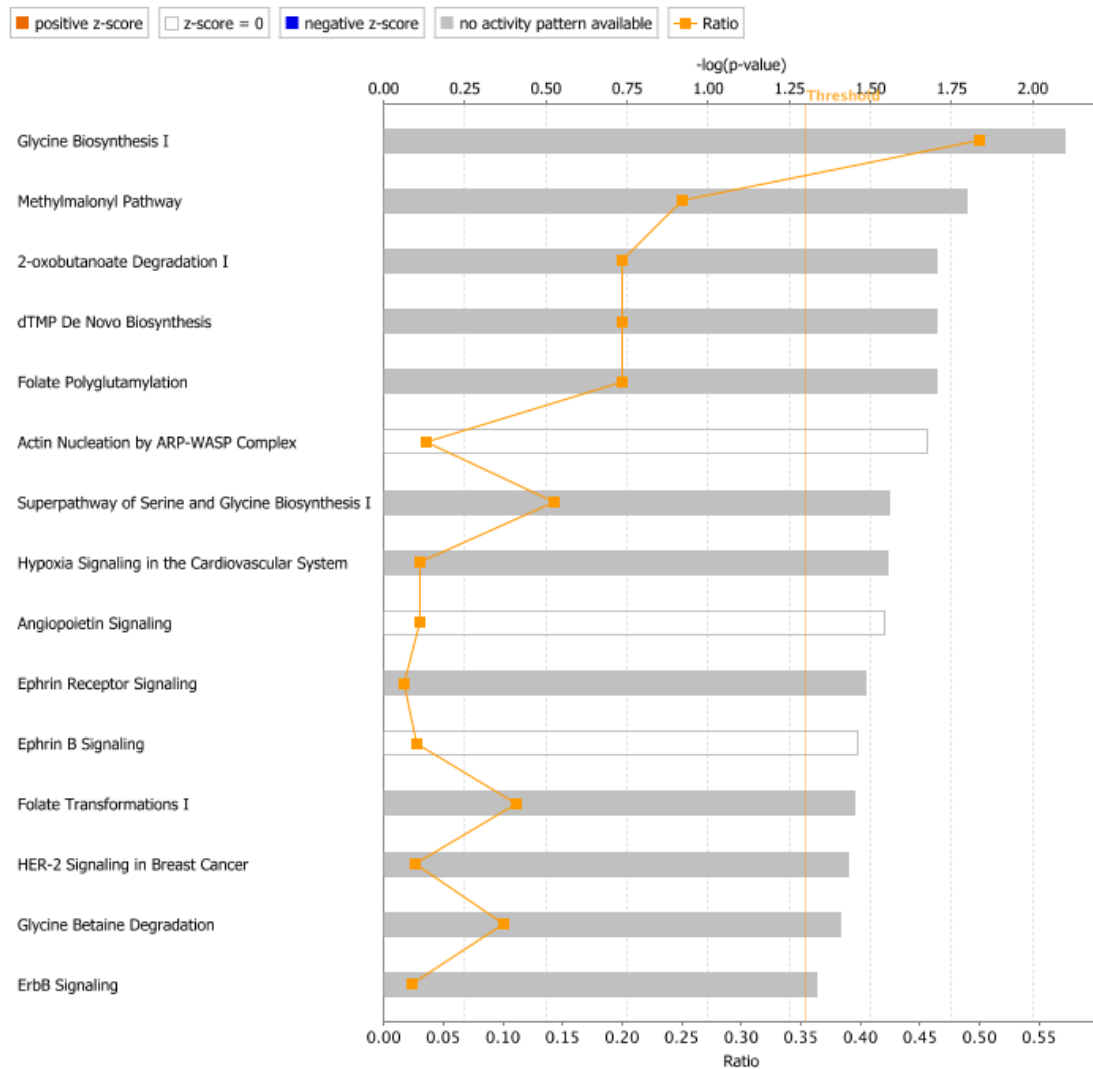

**Supplementary Figure 20** Canonical pathways significantly enriched in commonly expressed genes between ICSI BCB<sup>+</sup> and mICSI BCB<sup>-</sup> but different to ICSI BCB<sup>-</sup> blastocysts.

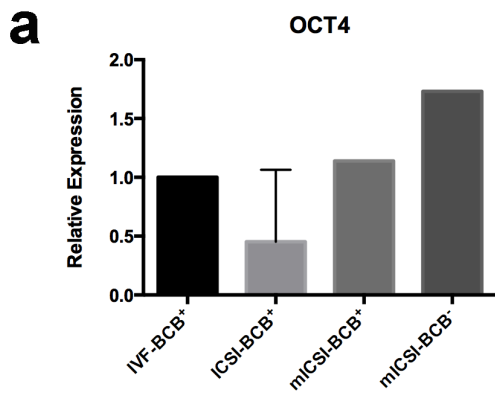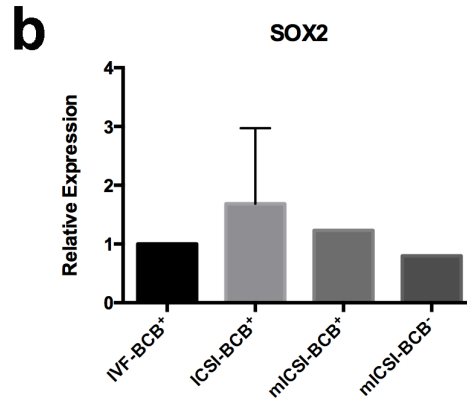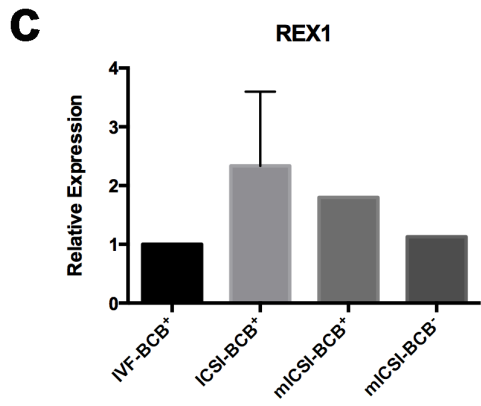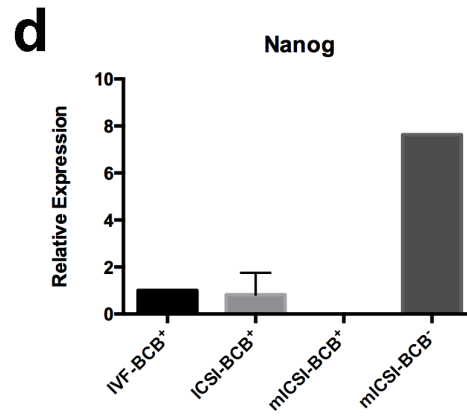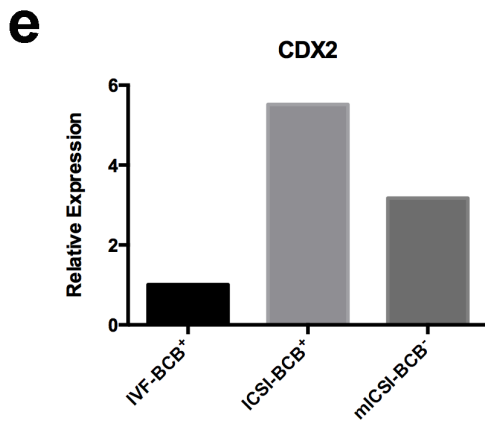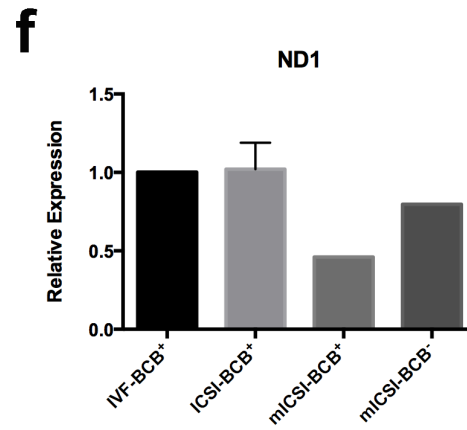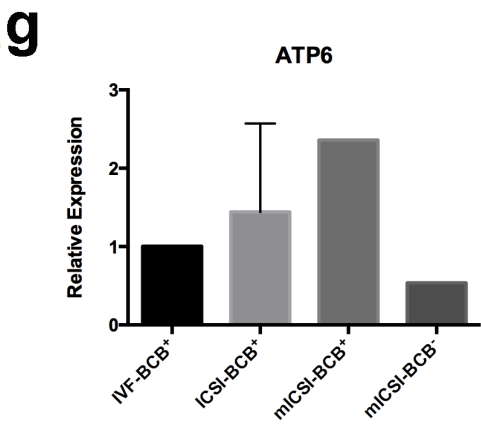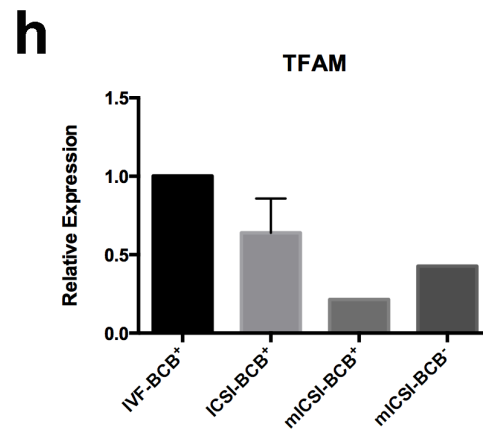

**Supplementary Figure 21** Relative gene expression for early regulators of development in blastocysts derived from IVF, ICSI and mICSI. Real-time RT-PCR values were normalized to ACT-B values and compared to IVF-blastocysts as the reference point. IVF and ICSI-BCB<sup>+</sup> values represent the mean ( $\pm$  SEM) of gene expression levels from 2 pools of 5 blastocysts each. Values for the mICSI-BCB<sup>-</sup> group represent gene expression from one pool of 5 blastocysts each.
